# Supplementary material
Source: publisher figshare collection journal article supplement (https://tandf.figshare.com/articles/dataset/_/1418247)
Supplement: Supplementary file 1 [file 3]

## Sheet: Supplmentary_Table_2.No_Cov
Chromosome	Start	End	Gene	Annotation	Distance_from_TSS
chr7	3218522	3218881	Mir290	5UTR	255
chr7	4642443	4642636	Brsk1	5UTR	107
chr7	16760769	16760888	Meis3	5UTR	96
chr7	17532905	17533264	Pnmal2	5UTR	2875
chr7	17533572	17533931	Pnmal2	5UTR	3542
chr7	19371732	19371851	Sycp1-ps1	5UTR	82
chr7	19511214	19511333	Nova2	5UTR	97
chr7	26472079	26472198	Tgfb1	5UTR	59
chr7	29281916	29282503	1700028B04Rik	5UTR	544
chr7	31827051	31827290	Fxyd5	5UTR	51
chr7	31911880	31911999	Scn1b	5UTR	84
chr7	36000115	36000234	Lrp3	5UTR	130
chr7	36000298	36000417	Lrp3	5UTR	66
chr7	38892350	38892469	Ccne1	5UTR	40
chr7	52436363	52436602	Pth2	5UTR	238
chr7	69526043	69526162	Magel2	5UTR	4179
chr7	88974237	88974356	Btbd1	5UTR	80
chr7	98239365	98239604	Dlg2	5UTR	70
chr7	104230231	104230350	Gab2	5UTR	90
chr7	106683967	106684086	Arrb1	5UTR	91
chr7	107413127	107413246	Gpx2-ps1	5UTR	74
chr7	112935860	112935979	Dchs1	5UTR	85
chr7	114514267	114514386	Syt9	5UTR	83
chr7	117009065	117009184	Scube2	5UTR	9
chr7	120100703	120100942	Rassf10	5UTR	3228
chr7	121862002	121862361	Calcb	5UTR	205
chr7	129432587	129432706	Prkcb	5UTR	68
chr7	134094305	134094424	Sez6l2	5UTR	257
chr7	134351856	134351975	Tbc1d10b	5UTR	7
chr7	149135867	149136099	Brsk2	5UTR	212
chr6	8459687	8459806	Glcci1	5UTR	92
chr6	12698969	12699088	Thsd7a	5UTR	165
chr6	29129459	29129578	Prrt4	5UTR	6
chr6	29383235	29383354	Flnc	5UTR	83
chr6	30254219	30254338	Ube2h	5UTR	201
chr6	36371647	36371886	Mir490	5UTR	145
chr6	39156621	39156740	Jhdm1d	5UTR	32
chr6	48986428	48986787	Gpnmb	5UTR	271
chr6	50060364	50060483	Mpp6	5UTR	125
chr6	77929462	77929701	Ctnna2	5UTR	199
chr6	86618978	86619097	Mxd1	5UTR	56
chr6	89312522	89312641	Plxna1	5UTR	85
chr6	92041429	92041548	Nr2c2	5UTR	18
chr6	92890672	92890791	9530026P05Rik	5UTR	97
chr6	100237219	100237338	Rybp	5UTR	14
chr6	105442277	105442636	Gm19757	5UTR	26
chr6	122436117	122436236	Rimklb	5UTR	87
chr6	124813844	124813963	Gpr162	5UTR	91
chr6	124867583	124867702	Ptms	5UTR	262
chr6	129641549	129641668	Mir680-1	5UTR	116
chr6	131338242	131338361	Ybx3	5UTR	107
chr5	3647719	3647838	Gatad1	5UTR	98
chr5	8622629	8622748	Rundc3b	5UTR	204
chr5	9725137	9725256	Grm3	5UTR	96
chr5	15440529	15440648	Cacna2d1	5UTR	21
chr5	21850355	21850474	Reln	5UTR	49
chr5	30768241	30768720	1700001C02Rik	5UTR	271
chr5	33361504	33361623	Ywhah	5UTR	40
chr5	33617422	33617541	Ctbp1	5UTR	112
chr5	35622403	35622522	Adra2c	5UTR	1189
chr5	38108006	38108125	Stk32b	5UTR	267
chr5	52607496	52607735	C130083M11Rik	5UTR	176
chr5	52957414	52957533	Lgi2	5UTR	105
chr5	53604505	53604624	Sel1l3	5UTR	67
chr5	65928476	65928595	Ube2k	5UTR	96
chr5	76913287	76913646	Gm7271	5UTR	186
chr5	88280099	88280338	Gm7337	5UTR	716
chr5	90795041	90795160	Ankrd17	5UTR	51
chr5	93635050	93635289	Ccni	5UTR	232
chr5	97426787	97426906	Bmp2k	5UTR	80
chr5	100929518	100929637	Lin54	5UTR	21
chr5	109987928	109988047	Crlf2	5UTR	84
chr5	115225172	115225291	Ankrd13a	5UTR	24
chr5	115722378	115722497	Rnf10	5UTR	407
chr5	115722518	115722637	Rnf10	5UTR	267
chr5	117864396	117864515	Ksr2	5UTR	386
chr5	118317111	118317230	Nos1	5UTR	103
chr5	120121586	120121705	Tbx3	5UTR	909
chr5	120121767	120121886	Tbx3	5UTR	1090
chr5	121641193	121641312	Ptpn11	5UTR	94
chr5	121995448	121995567	Mapkapk5	5UTR	334
chr5	122734480	122734599	Pptc7	5UTR	74
chr5	122951939	122952058	Atp2a2	5UTR	176
chr5	124804457	124804576	Cdk2ap1	5UTR	61
chr5	125659339	125659458	Ncor2	5UTR	126
chr5	125921948	125922067	Bri3bp	5UTR	11
chr5	128938736	128938855	Tmem132d	5UTR	82
chr5	145726495	145726614	Smurf1	5UTR	85
chr5	150614163	150614402	Gm21221	5UTR	163
chr5	150821219	150821338	Rxfp2	5UTR	89
chr5	151304340	151304686	Gm5	5UTR	108
chr4	6381274	6381513	Nsmaf	5UTR	144
chr4	10934628	10934747	Plekhf2	5UTR	19
chr4	33118447	33118566	Ube2j1	5UTR	48
chr4	34498220	34498339	Akirin2	5UTR	357
chr4	43456181	43456300	Tesk1	5UTR	1033
chr4	44136358	44136477	Gm12504	5UTR	1594
chr4	55431528	55431647	Gm12505	5UTR	67
chr4	58925313	58925552	AI314180	5UTR	45
chr4	62626633	62626752	Zfp618	5UTR	26
chr4	63707752	63708231	Tnc	5UTR	297
chr4	64785452	64785691	Pappa	5UTR	245
chr4	66065409	66065528	Astn2	5UTR	108
chr4	106584245	106584364	Ssbp3	5UTR	171
chr4	106769619	106769738	Cdcp2	5UTR	124
chr4	109349311	109349430	Faf1	5UTR	80
chr4	116136521	116136640	Mast2	5UTR	148
chr4	118868001	118868120	Ccdc23	5UTR	87
chr4	120077907	120078026	Scmh1	5UTR	22
chr4	126210594	126210713	Ago4	5UTR	108
chr4	134409097	134409216	Tmem57	5UTR	44
chr4	140924103	140924222	Fam131c	5UTR	116
chr4	148892411	148892530	Ctnnbip1	5UTR	62
chr4	151712923	151713162	Chd5	5UTR	164
chr4	155108936	155109055	Tmem240	5UTR	24
chr4	155221514	155221633	Dvl1	5UTR	113
chr3	3508021	3508140	Hnf4g	5UTR	111
chr3	9609713	9609832	Zfp704	5UTR	253
chr3	19211220	19211339	Pde7a	5UTR	102
chr3	21975663	21975782	Tbl1xr1	5UTR	90
chr3	32515336	32515455	Gnb4	5UTR	2
chr3	35952294	35952533	Ccdc144b	5UTR	175
chr3	45182689	45182928	Pcdh10	5UTR	370
chr3	49560903	49561142	Pcdh18	5UTR	96
chr3	67696021	67696380	Gm21949	5UTR	239
chr3	68673560	68673679	1110032F04Rik	5UTR	53
chr3	89577492	89577611	Ube2q1	5UTR	81
chr3	89635253	89635492	She	5UTR	201
chr3	94203101	94203340	Lingo4	5UTR	200
chr3	94240362	94240601	Oaz3	5UTR	176
chr3	95908483	95908602	Otud7b	5UTR	34
chr3	95985128	95985247	Sv2a	5UTR	98
chr3	96025845	96025964	Hist2h2be	5UTR	802
chr3	96255873	96256352	BC107364	5UTR	356
chr3	101091787	101091906	Cd2	5UTR	75
chr3	102008497	102008616	Vangl1	5UTR	119
chr3	104024167	104024286	Magi3	5UTR	43
chr3	105255253	105255372	Kcnd3	5UTR	6
chr3	107989279	107989398	Amigo1	5UTR	27
chr3	109143563	109143682	Vav3	5UTR	82
chr3	116316786	116317145	Trmt13	5UTR	360
chr3	116671167	116671526	4930455H04Rik	5UTR	342
chr3	121948679	121948798	Gclm	5UTR	205
chr3	126067197	126067316	Arsj	5UTR	428
chr3	127599119	127599238	5730508B09Rik	5UTR	3
chr3	137729894	137730013	Gm5105	5UTR	339
chr3	142544604	142544723	Pkn2	5UTR	245
chr3	144383161	144383280	Sh3glb1	5UTR	7
chr3	151100748	151100987	Eltd1	5UTR	142
chr2	4073792	4074031	Frmd4a	5UTR	123
chr2	24618595	24618714	Cacna1b	5UTR	77
chr2	29475434	29475553	Rapgef1	5UTR	195
chr2	32702676	32702795	Stxbp1	5UTR	81
chr2	38569981	38570100	Nr5a1	5UTR	81
chr2	48669612	48669731	Acvr2a	5UTR	103
chr2	49306995	49307114	Epc2	5UTR	109
chr2	49307146	49307265	Epc2	5UTR	141
chr2	51893513	51893872	Tnfaip6	5UTR	240
chr2	62411747	62412106	Fap	5UTR	331
chr2	63935972	63936211	Fign	5UTR	123
chr2	69218434	69218791	Dhrs9	5UTR	273
chr2	71624968	71625087	Itga6	5UTR	92
chr2	76820407	76820646	Ttn	5UTR	197
chr2	78709340	78709459	Ube2e3	5UTR	137
chr2	116947176	116947295	Spred1	5UTR	370
chr2	118727422	118727541	Bahd1	5UTR	72
chr2	119303187	119303306	Ino80	5UTR	59
chr2	124962425	124962544	Ctxn2	5UTR	117
chr2	125549773	125549892	Shc4	5UTR	111
chr2	131970694	131970813	Slc23a2	5UTR	31
chr2	135883703	135884182	Lamp5	5UTR	41
chr2	139504133	139504252	Ism1	5UTR	220
chr2	150834994	150835233	Ninl	5UTR	140
chr2	152857628	152857747	Xkr7	5UTR	41
chr2	153067232	153067351	Pofut1	5UTR	84
chr2	159772948	159773307	4933416E03Rik	5UTR	231
chr2	162486712	162486831	Ptprt	5UTR	52
chr2	163051080	163051319	Tox2	5UTR	130
chr2	167515778	167515897	Cebpb	5UTR	1364
chr2	167906585	167906704	Pard6b	5UTR	82
chr2	173101936	173102055	Pmepa1	5UTR	98
chr2	180773795	180773914	Chrna4	5UTR	87
chr2	181049047	181049166	Stmn3	5UTR	39
chr2	181193938	181194057	Zbtb46	5UTR	74
chr1	9788266	9788385	Sgk3	5UTR	56
chr1	19093220	19093339	Tfap2d	5UTR	118
chr1	19198908	19199387	Tfap2b	5UTR	393
chr1	34899658	34899777	Fam168b	5UTR	118
chr1	36125301	36125420	Hs6st1	5UTR	57
chr1	42755530	42755889	Pou3f3	5UTR	1540
chr1	66863988	66864107	Kansl1l	5UTR	62
chr1	71934878	71935117	Gm8883	5UTR	193
chr1	80210397	80210516	Fam124b	5UTR	3
chr1	82287719	82287838	Irs1	5UTR	176
chr1	82583188	82583427	Col4a4	5UTR	236
chr1	85106276	85106515	A530032D15Rik	5UTR	152
chr1	95651102	95651341	Thap4	5UTR	74
chr1	134942609	134942728	Pik3c2b	5UTR	21
chr1	158488918	158489277	Abl2	5UTR	1
chr1	162836619	162836738	Rc3h1	5UTR	78
chr1	165655075	165655314	Mettl11b	5UTR	49
chr1	169528287	169529246	Rxrg	5UTR	754
chr1	174310496	174310615	Pigm	5UTR	3835
chr1	183141708	183141827	Wdr26	5UTR	282
chr1	183949702	183949821	Enah	5UTR	290
chrx	5624614	5624733	Nudt11	5UTR	109
chrx	8610701	8610820	Fthl17	5UTR	90
chrx	10885879	10885998	Gm14482	5UTR	118
chrx	16394222	16394701	Maob	5UTR	270
chrx	16488618	16488737	Ndp	5UTR	153
chrx	20265752	20265871	Cdk16	5UTR	134
chrx	20666171	20666290	Zfp300	5UTR	65
chrx	35065533	35066132	Rhox4g	5UTR	301
chrx	45694363	45694722	Bcorl1	5UTR	188
chrx	50911081	50911320	Cxx1c	5UTR	222
chrx	53984920	53985039	Fhl1	5UTR	76
chrx	63902405	63902764	Slitrk2	5UTR	272
chrx	69177799	69178038	Gm1141	5UTR	23
chrx	70748526	70748645	Atp2b3	5UTR	102
chrx	70918517	70918756	Slc6a8	5UTR	46
chrx	71550414	71550533	Gdi1	5UTR	64
chrx	91213929	91214168	AU015836	5UTR	174
chrx	97963303	97963422	Dlg3	5UTR	242
chrx	99448066	99448185	Gm14858	5UTR	77
chrx	137908367	137908606	Col4a6	5UTR	13
chrx	139828528	139829007	Chrdl1	5UTR	277
chrx	147481806	147481925	Fgd1	5UTR	94
chrx	149932810	149932929	Ubqln2	5UTR	36
chry	234004	234483	Kdm5d	5UTR	253
chr9	15678837	15679076	Mtnr1b	5UTR	163
chr9	21043396	21043515	Keap1	5UTR	261
chr9	21091984	21092823	Kri1	5UTR	429
chr9	22272654	22272773	Rp9	5UTR	27
chr9	24956119	24956238	Herpud2	5UTR	42
chr9	32503740	32503859	Ets1	5UTR	114
chr9	58883899	58884018	Neo1	5UTR	230
chr9	70351322	70351441	Rnf111	5UTR	91
chr9	72510142	72510261	Nedd4	5UTR	108
chr9	77602373	77602492	Gclc	5UTR	32
chr9	79914810	79914929	Senp6	5UTR	101
chr9	79915034	79915153	Senp6	5UTR	325
chr9	92087995	92088114	Plscr5	5UTR	222
chr9	98858331	98858570	Foxl2	5UTR	2306
chr9	102737214	102737333	Ryk	5UTR	84
chr9	107302162	107302281	Cacna2d2	5UTR	71
chr9	118835664	118835783	Ctdspl	5UTR	11
chr9	123836212	123837771	Cdkn2d	5UTR	912
chr8	3945903	3946262	Cd209c	5UTR	601
chr8	3946301	3946660	Cd209c	5UTR	203
chr8	12757035	12757154	Atp11a	5UTR	20
chr8	13159182	13159301	Lamp1	5UTR	48
chr8	15046002	15046121	BB014433	5UTR	76
chr8	34710067	34710186	Ppp2cb	5UTR	94
chr8	38015270	38015509	Dlc1	5UTR	226
chr8	42912600	42912839	2810404M03Rik	5UTR	219
chr8	48437342	48437581	Stox2	5UTR	121
chr8	49075808	49075927	Wwc2	5UTR	97
chr8	67373547	67373666	Klhl2	5UTR	50
chr8	67653149	67653388	BC030870	5UTR	48
chr8	86222981	86223100	Pkn1	5UTR	97
chr8	86424370	86424489	Lphn1	5UTR	374
chr8	86939292	86939411	Cacna1a	5UTR	30
chr8	87356078	87356197	Dand5	5UTR	86
chr8	90483147	90483266	Zfp423	5UTR	228
chr8	91045291	91045410	Nkd1	5UTR	49
chr8	92871977	92872096	Tox3	5UTR	55
chr8	98012571	98012690	Csnk2a2	5UTR	30
chr8	106694461	106694580	Bean1	5UTR	49
chr8	107319084	107319203	4932416K20Rik	5UTR	67
chr8	107694696	107694815	Cbfb	5UTR	123
chr8	112229680	112229799	Zfp821	5UTR	232
chr8	124806246	124806365	Zfpm1	5UTR	206
chr8	124999990	125000109	Ctu2	5UTR	67
chr8	125074974	125075093	Piezo1	5UTR	136
chr8	127536061	127537846	Tsnax	5UTR	950
chr13	12199021	12199140	Ryr2	5UTR	72
chr13	18035838	18035957	Rala	5UTR	94
chr13	29107949	29108428	A330102I10Rik	5UTR	305
chr13	31717860	31717979	Foxf2	5UTR	176
chr13	34436672	34436791	Slc22a23	5UTR	260
chr13	34436895	34437014	Slc22a23	5UTR	37
chr13	47201419	47201538	Dek	5UTR	51
chr13	48356779	48356898	Id4	5UTR	103
chr13	54850903	54851022	Gprin1	5UTR	8
chr13	56279884	56280243	Tifab	5UTR	3
chr13	58375392	58375511	Gkap1	5UTR	38
chr13	59658604	59658723	Agtpbp1	5UTR	76
chr13	60307194	60307673	Gm5084	5UTR	363
chr13	66214128	66214727	Gm10324	5UTR	339
chr13	69138176	69138295	Adcy2	5UTR	124
chr13	69672516	69672635	Papd7	5UTR	107
chr13	70980565	70980684	Adamts16	5UTR	4
chr13	112599124	112599243	Map3k1	5UTR	67
chr13	113078969	113079208	Ankrd55	5UTR	311
chr13	113999801	114000040	Esm1	5UTR	174
chr12	3572421	3572780	Dtnb	5UTR	31
chr12	8605501	8605860	Slc7a15	5UTR	12
chr12	25366477	25366596	Cys1	5UTR	64
chr12	38607369	38607488	Dgkb	5UTR	78
chr12	50485028	50485147	Foxg1	5UTR	1159
chr12	73862303	73862422	Ppm1a	5UTR	106
chr12	91976692	91976811	Dio2	5UTR	67
chr12	109241517	109241636	Bcl11b	5UTR	107
chr12	109513448	109513567	Ccdc85c	5UTR	60
chr12	110831001	110831120	Mir127	5UTR	65
chr12	110833480	110833599	Mir136	5UTR	63
chr12	110948843	110948962	Mir299	5UTR	115
chr12	110955443	110955562	Mir543	5UTR	95
chr12	110981181	110981660	Mir409	5UTR	293
chr12	112404706	112404825	Traf3	5UTR	67
chr12	113912308	113912427	Akt1	5UTR	60
chr11	21139097	21139216	Vps54	5UTR	206
chr11	41995621	41995860	Gabra1	5UTR	572
chr11	46202832	46203071	Itk	5UTR	185
chr11	50415573	50415692	Adamts2	5UTR	106
chr11	53164387	53164506	Aff4	5UTR	119
chr11	56825062	56825181	Gria1	5UTR	62
chr11	57615403	57615522	Sap30l	5UTR	265
chr11	59476000	59476119	Mprip	5UTR	4
chr11	59918750	59918869	Rai1	5UTR	236
chr11	67735573	67735692	Usp43	5UTR	82
chr11	69647896	69648015	Nlgn2	5UTR	336
chr11	74433147	74433266	E130309D14Rik	5UTR	41
chr11	74983105	74983464	Hic1	5UTR	293
chr11	79806751	79806870	Suz12	5UTR	144
chr11	80593408	80593527	Myo1d	5UTR	119
chr11	82988821	82988940	Slfn4	5UTR	134
chr11	87881824	87881943	Vezf1	5UTR	44
chr11	88579341	88579580	Msi2	5UTR	202
chr11	94871330	94871449	Samd14	5UTR	138
chr11	96325889	96326008	Skap1	5UTR	104
chr11	97049051	97049170	Kpnb1	5UTR	36
chr11	97141734	97141853	Npepps	5UTR	37
chr11	99184114	99184353	Krt25	5UTR	141
chr11	101755363	101755482	Meox1	5UTR	186
chr11	101755530	101755649	Meox1	5UTR	19
chr11	104303358	104303597	Kansl1	5UTR	8
chr11	106781670	106781789	Smurf2	5UTR	240
chr11	108256503	108256742	Apoh	5UTR	132
chr11	116274197	116274316	Rnf157	5UTR	30
chr11	120210030	120210149	0610009L18Rik	5UTR	39
chr10	11001140	11001259	Fbxo30	5UTR	13
chr10	20444567	20444806	Pde7b	5UTR	68
chr10	21410688	21410807	Gm5420	5UTR	38
chr10	28863917	28864036	Soga3	5UTR	116
chr10	29081733	29081852	Rnf146	5UTR	396
chr10	39452075	39452194	Rev3l	5UTR	110
chr10	61534867	61534986	Gm5424	5UTR	1098
chr10	61884986	61885345	Hkdc1	5UTR	219
chr10	62666488	62666607	Mypn	5UTR	93
chr10	75395146	75395265	Mmp11	5UTR	62
chr10	77356557	77356676	1700009J07Rik	5UTR	393
chr10	79144969	79145088	Cdc34	5UTR	30
chr10	79642185	79642304	Efna2	5UTR	78
chr10	80119718	80119837	Btbd2	5UTR	98
chr10	82296633	82296872	Txnrd1	5UTR	177
chr10	84218943	84219182	Rfx4	5UTR	151
chr10	86241740	86241859	Nt5dc3	5UTR	110
chr10	105907350	105907709	Ppfia2	5UTR	344
chr10	110037773	110037892	9230102K24Rik	5UTR	68
chr10	116387369	116387488	Rab3ip	5UTR	67
chr10	117282856	117282975	Rap1b	5UTR	55
chr10	118850388	118850627	1700025F24Rik	5UTR	128
chr10	122513300	122513419	Mon2	5UTR	142
chr10	124765419	124765538	Slc16a7	5UTR	53
chr10	126516304	126516543	Agap2	5UTR	342
chr10	126725760	126725879	Mbd6	5UTR	67
chr17	3115267	3115386	Scaf8	5UTR	296
chr17	4081871	4082350	4930470H14Rik	5UTR	645
chr17	5841354	5841473	Snx9	5UTR	94
chr17	6448660	6448779	Tmem181b-ps	5UTR	1363
chr17	6449399	6449638	Tmem181b-ps	5UTR	504
chr17	8118699	8119058	Tagap	5UTR	194
chr17	15145955	15147985	Gm3435	5UTR	1182
chr17	15842075	15842194	Chd1	5UTR	145
chr17	24278372	24278491	Pdpk1	5UTR	70
chr17	24625840	24625959	Caskin1	5UTR	113
chr17	26275694	26275813	Axin1	5UTR	64
chr17	28046301	28046420	Anks1	5UTR	17
chr17	30763850	30764209	Dnah8	5UTR	329
chr17	34118640	34118759	AA388235	5UTR	204
chr17	42828983	42829222	Gpr115	5UTR	11
chr17	43526500	43526619	Gpr116	5UTR	86
chr17	43804332	43804539	Cyp39a1	5UTR	166
chr17	45686371	45686490	Tmem151b	5UTR	136
chr17	46391142	46391261	Lrrc73	5UTR	29
chr17	48061516	48061635	Foxp4	5UTR	65
chr17	53706242	53706481	Kat2b	5UTR	186
chr17	71947225	71947344	Trmt61b	5UTR	757
chr17	74694051	74694170	Memo1	5UTR	33
chr17	83750429	83750548	Eml4	5UTR	159
chr17	84031056	84031295	Kcng3	5UTR	179
chr16	4594715	4594834	Glis2	5UTR	3
chr16	17894298	17894537	Tssk1	5UTR	3
chr16	20716131	20716370	Clcn2	5UTR	339
chr16	32079233	32079352	Pak2	5UTR	7
chr16	33380998	33381117	Zfp148	5UTR	138
chr16	33684515	33684634	Heg1	5UTR	83
chr16	33829978	33830097	Itgb5	5UTR	228
chr16	44173452	44173571	Gm608	5UTR	62
chr16	49980585	49980824	Gm6936	5UTR	13
chr16	84972739	84972978	Gm10791	5UTR	284
chr15	27396507	27396626	Ank	5UTR	76
chr15	27955228	27955347	Trio	5UTR	256
chr15	27955473	27955592	Trio	5UTR	11
chr15	31460562	31460681	2015-03-06	5UTR	111
chr15	38008407	38008526	Ubr5	5UTR	82
chr15	38837832	38837951	Fzd6	5UTR	7
chr15	48623159	48623758	Csmd3	5UTR	376
chr15	57817458	57817577	Fam83a	5UTR	1
chr15	63891915	63892034	Fam49b	5UTR	95
chr15	68758893	68759012	Khdrbs3	5UTR	44
chr15	76352317	76352436	Scrt1	5UTR	123
chr15	81082071	81082309	8430426J06Rik	5UTR	221
chr15	84686476	84686595	Phf21b	5UTR	83
chr15	88564587	88564706	Brd1	5UTR	62
chr15	93167189	93167308	Yaf2	5UTR	58
chr15	94459595	94459714	Tmem117	5UTR	99
chr15	96291088	96291207	Scaf11	5UTR	67
chr15	100416393	100416632	Pou6f1	5UTR	164
chr15	103197114	103197233	Itga5	5UTR	65
chr14	25064746	25064865	Dlg5	5UTR	277
chr14	26722245	26722604	Plac9b	5UTR	212
chr14	26746537	26747376	Tmem254a	5UTR	621
chr14	27025911	27026750	Tmem254b	5UTR	600
chr14	33498179	33498298	3425401B19Rik	5UTR	160
chr14	34260232	34260351	Mapk8	5UTR	112
chr14	45839471	45839590	Gpr137c	5UTR	80
chr14	48740593	48740712	Peli2	5UTR	50
chr14	48818540	48818899	Gm6498	5UTR	150
chr14	57430427	57430666	Zmym5	5UTR	126
chr14	64345916	64346275	Mir598	5UTR	250
chr14	70919837	70919956	Bmp1	5UTR	111
chr14	74755266	74755505	4933402J15Rik	5UTR	172
chr14	120877665	120877784	Rap2a	5UTR	102
chr14	121778311	121778430	Stk24	5UTR	22
chr19	3686447	3686566	Lrp5	5UTR	117
chr19	7062077	7062196	Vegfb	5UTR	64
chr19	16207436	16207555	Gnaq	5UTR	116
chr19	16207585	16207704	Gnaq	5UTR	265
chr19	16239189	16239548	E030024N20Rik	5UTR	602
chr19	16244317	16244556	E030024N20Rik	5UTR	5730
chr19	27291827	27291946	Vldlr	5UTR	318
chr19	32832099	32832218	Pten	5UTR	33
chr19	53150817	53150936	1700054A03Rik	5UTR	76
chr19	55255279	55255638	Tectb	5UTR	264
chr19	57435475	57435594	Fam160b1	5UTR	96
chr19	59420161	59420280	Pdzd8	5UTR	109
chr18	10725906	10726025	Mib1	5UTR	284
chr18	16967324	16967563	Cdh2	5UTR	234
chr18	35931439	35931558	Ube2d2a	5UTR	227
chr18	52927544	52927663	Sncaip	5UTR	80
chr18	69110566	69110685	4930546C10Rik	5UTR	497
chr18	72510060	72510179	Dcc	5UTR	544
chr18	72510212	72510331	Dcc	5UTR	392
chr18	76401471	76401590	Smad2	5UTR	117
chr18	79305908	79306027	Setbp1	5UTR	103
chr7	4724628	4724867	Il11	3UTR	4876
chr7	6142250	6142369	Zfp444	3UTR	18136
chr7	16556639	16556758	Gltscr1	3UTR	28086
chr7	17310751	17310990	Ceacam9	3UTR	3474
chr7	17500981	17501460	Calm3	3UTR	7921
chr7	17501579	17501818	Calm3	3UTR	7563
chr7	17800684	17800803	Psg29	3UTR	11859
chr7	19549259	19549498	Nova2	3UTR	38023
chr7	19888481	19888600	Fosb	3UTR	6794
chr7	24912338	24912577	Zfp112	3UTR	15000
chr7	25368613	25369212	Zfp575	3UTR	3448
chr7	25425532	25425891	Lypd3	3UTR	3944
chr7	26248809	26248928	Ceacam1	3UTR	13716
chr7	26452817	26452936	Exosc5	3UTR	8646
chr7	26588016	26588255	Cyp2s1	3UTR	13294
chr7	28090102	28090221	Ltbp4	3UTR	32410
chr7	28301088	28301327	Prx	3UTR	16746
chr7	28366314	28366433	2310022A10Rik	3UTR	28006
chr7	28745347	28745706	Zfp780b	3UTR	18470
chr7	30701133	30701372	Zfp383	3UTR	7598
chr7	30812164	30812283	Zfp568	3UTR	43191
chr7	30946280	30946759	Zfp146	3UTR	7987
chr7	30947727	30948086	Zfp146	3UTR	6660
chr7	31854552	31854911	Lgi4	3UTR	9599
chr7	36423409	36423528	Ankrd27	3UTR	52144
chr7	36423646	36424005	Ankrd27	3UTR	52381
chr7	36557988	36558107	Zfp507	3UTR	29901
chr7	50932926	50933165	Ctu1	3UTR	5526
chr7	51613154	51613393	Shank1	3UTR	47521
chr7	52085433	52085672	Nup62	3UTR	13644
chr7	52249729	52249848	Gm15545	3UTR	7460
chr7	52332649	52332888	Nosip	3UTR	14851
chr7	52875610	52875849	Fut1	3UTR	2635
chr7	53359766	53360125	Abcc8	3UTR	75278
chr7	53692618	53692977	Kcnc1	3UTR	40752
chr7	53943385	53943624	Saal1	3UTR	22397
chr7	54009556	54009675	Saa2	3UTR	2354
chr7	65081597	65081836	Gabrb3	3UTR	235694
chr7	75506278	75506397	Fam169b	3UTR	87554
chr7	75884038	75884277	Arrdc4	3UTR	9847
chr7	80830462	80830581	Gm4971	3UTR	868
chr7	80831123	80831362	Gm4971	3UTR	87
chr7	87535508	87535627	Furin	3UTR	14690
chr7	88060670	88060789	Sec11a	3UTR	31647
chr7	88927325	88927444	3110040N11Rik	3UTR	6895
chr7	97014691	97014810	Ccdc81	3UTR	37329
chr7	97558009	97558128	Sytl2	3UTR	60801
chr7	104561810	104562049	Thrsp	3UTR	3971
chr7	105332590	105332829	Gm16938	3UTR	6887
chr7	107688173	107688412	Coa4	3UTR	2560
chr7	116595944	116596183	Trim66	3UTR	55465
chr7	119261320	119261559	Dkk3	3UTR	41012
chr7	121183983	121184222	Spon1	3UTR	274472
chr7	123267605	123267844	Plekha7	3UTR	65511
chr7	129771389	129771628	Prkcb	3UTR	338751
chr7	130113395	130113514	4930413G21Rik	3UTR	459
chr7	134158461	134158700	Pagr1a	3UTR	2166
chr7	134562563	134562682	Zfp688	3UTR	2866
chr7	135396854	135396973	Tgfb1i1	3UTR	6470
chr7	135841892	135842011	Mcmbp	3UTR	41932
chr7	137967804	137968043	Btbd16	3UTR	50222
chr7	139749542	139749781	Oat	3UTR	18300
chr7	144433108	144433467	Gm10578	3UTR	6743
chr7	146764521	146764640	Inpp5a	3UTR	189514
chr7	148032465	148032704	Scgb1c1	3UTR	1002
chr7	148049504	148049743	Ric8	3UTR	6209
chr7	149267493	149267612	Dusp8	3UTR	13577
chr7	150966034	150966153	Mrgpre	3UTR	4252
chr6	4592348	4592587	Casd1	3UTR	41283
chr6	4704132	4704251	Peg10	3UTR	6827
chr6	8377208	8377327	Gm16039	3UTR	167921
chr6	8546717	8547196	Glcci1	3UTR	87122
chr6	13036924	13037163	Tmem106b	3UTR	17166
chr6	22204527	22204987	Cped1	3UTR	268618
chr6	22258205	22258324	Fam3c	3UTR	47757
chr6	24522567	24522686	Asb15	3UTR	44424
chr6	24522715	24522834	Asb15	3UTR	44572
chr6	25693933	25694052	Pot1a	3UTR	65174
chr6	28367882	28368001	Gcc1	3UTR	3723
chr6	34454372	34454611	Bpgm	3UTR	28017
chr6	39347885	39348124	Mkrn1	3UTR	22244
chr6	50245170	50245409	Osbpl3	3UTR	160760
chr6	55297451	55297690	Aqp1	3UTR	11159
chr6	65068834	65069193	Hpgds	3UTR	25531
chr6	71327580	71327819	Cd8a	3UTR	4160
chr6	71757938	71758057	Reep1	3UTR	100264
chr6	81846522	81846761	Mir468	3UTR	148
chr6	82675782	82675901	Hk2	3UTR	48547
chr6	82675992	82676231	Hk2	3UTR	48217
chr6	83315226	83315585	Tet3	3UTR	76087
chr6	83316173	83316412	Tet3	3UTR	75260
chr6	83317009	83317248	Tet3	3UTR	74424
chr6	83642851	83642970	Vax2os	3UTR	19225
chr6	83688093	83688332	Vax2	3UTR	26836
chr6	84521964	84522203	Cyp26b1	3UTR	21699
chr6	86224479	86224718	Tgfa	3UTR	79235
chr6	86337262	86337621	Pcyox1	3UTR	9523
chr6	87625657	87625776	1810020O05Rik	3UTR	15065
chr6	91706708	91706947	Slc6a6	3UTR	72648
chr6	94555512	94555871	Lrig1	3UTR	94268
chr6	97237879	97238118	Frmd4b	3UTR	329533
chr6	112669185	112669544	Srgap3	3UTR	227716
chr6	113120636	113120875	Lhfpl4	3UTR	24503
chr6	114431221	114431340	Hrh1	3UTR	83292
chr6	115679517	115679636	Tmem40	3UTR	32848
chr6	115876359	115876478	Ift122	3UTR	72814
chr6	124710366	124710605	Eno2	3UTR	8922
chr6	125256502	125256741	Ltbr	3UTR	7147
chr6	125410558	125410797	Cd9	3UTR	33976
chr6	127443722	127444081	Parp11	3UTR	39982
chr6	128273009	128273128	Tulp3	3UTR	32741
chr6	128307409	128307768	Rhno1	3UTR	5147
chr6	128307956	128308315	Rhno1	3UTR	4600
chr6	128956545	128956784	BC064078	3UTR	13508
chr6	134387821	134388060	Bcl2l14	3UTR	41475
chr6	134819276	134819515	Gpr19	3UTR	28428
chr6	134819575	134819694	Gpr19	3UTR	28249
chr6	134935257	134935376	Apold1	3UTR	3239
chr6	135680102	135680341	Grin2b	3UTR	443188
chr6	135680488	135680727	Grin2b	3UTR	442802
chr6	135681841	135681960	Grin2b	3UTR	441569
chr6	136750735	136750974	Hist4h4	3UTR	1978
chr6	142351106	142351225	Golt1b	3UTR	15344
chr6	142538719	142539078	Abcc9	3UTR	111716
chr6	142734690	142734929	Gm766	3UTR	18057
chr6	143153691	143154050	Etnk1	3UTR	37942
chr6	143246100	143246339	D6Ertd474e	3UTR	51693
chr6	143780304	143780543	Sox5	3UTR	377545
chr6	144942326	144942445	Bcat1	3UTR	82232
chr6	144948091	144948330	Bcat1	3UTR	76347
chr6	145807170	145807409	Bhlhe41	3UTR	6531
chr6	145910195	145910434	Sspn	3UTR	27529
chr6	147056740	147056859	Klhl42	3UTR	17144
chr6	147060583	147060822	Klhl42	3UTR	20987
chr5	3521825	3522064	Cdk6	3UTR	177514
chr5	23012251	23012490	Srpk2	3UTR	109899
chr5	23923532	23923771	Asic3	3UTR	4264
chr5	24369317	24369436	Prkag2	3UTR	237024
chr5	24369470	24369829	Prkag2	3UTR	236631
chr5	25355730	25355969	Actr3b	3UTR	89887
chr5	28403778	28403897	Insig1	3UTR	5827
chr5	28404041	28404160	Insig1	3UTR	6090
chr5	28784229	28784348	Shh	3UTR	9293
chr5	30112646	30112885	Dnajb6	3UTR	50209
chr5	30595554	30595913	Ept1	3UTR	36397
chr5	33590951	33591070	Ctbp1	3UTR	26583
chr5	34078178	34078297	Fgfr3	3UTR	13806
chr5	34078931	34079170	Fgfr3	3UTR	14559
chr5	34828644	34828763	Fam193a	3UTR	116063
chr5	36944907	36945146	D5Ertd579e	3UTR	142114
chr5	53210923	53211042	Zcchc4	3UTR	36618
chr5	65220772	65221011	Klf3	3UTR	26011
chr5	65775117	65775236	Klb	3UTR	35468
chr5	66379349	66379588	9130230L23Rik	3UTR	15936
chr5	66690689	66690928	Apbb2	3UTR	319128
chr5	66691686	66692045	Apbb2	3UTR	318011
chr5	66692160	66692399	Apbb2	3UTR	317657
chr5	67446520	67446639	Limch1	3UTR	309442
chr5	67486485	67486604	Phox2b	3UTR	3761
chr5	67486642	67486881	Phox2b	3UTR	3484
chr5	67487002	67487361	Phox2b	3UTR	3004
chr5	67746494	67746613	Slc30a9	3UTR	48299
chr5	67785023	67785262	Bend4	3UTR	33776
chr5	67788488	67788847	Bend4	3UTR	30191
chr5	67788944	67789063	Bend4	3UTR	29975
chr5	68009682	68009801	Atp8a1	3UTR	228869
chr5	73059647	73059886	Nipal1	3UTR	20613
chr5	73087600	73087959	Txk	3UTR	56053
chr5	73412092	73412331	Fryl	3UTR	235526
chr5	73713545	73713904	Ociad2	3UTR	15974
chr5	75591305	75591544	Pdgfra	3UTR	42990
chr5	76329710	76330069	Kdr	3UTR	44384
chr5	77300995	77301234	C530008M17Rik	3UTR	31372
chr5	92686716	92687075	Naaa	3UTR	20132
chr5	93600373	93600492	2015-09-11	3UTR	77891
chr5	100386171	100386290	Hnrnpd	3UTR	21667
chr5	103341021	103341260	Mapk10	3UTR	299093
chr5	103342010	103342369	Mapk10	3UTR	297984
chr5	104291353	104291592	Klhl8	3UTR	48656
chr5	104291903	104292262	Klhl8	3UTR	47986
chr5	104418923	104419042	Hsd17b11	3UTR	31773
chr5	104419064	104419439	Hsd17b11	3UTR	31376
chr5	107537239	107537478	Tgfbr3	3UTR	181136
chr5	108931339	108931818	Pcgf3	3UTR	40989
chr5	110532540	110532779	Plcxd1	3UTR	3553
chr5	112743896	112744135	Tpst2	3UTR	38170
chr5	112850564	112850803	Sez6l	3UTR	155415
chr5	112850823	112851062	Sez6l	3UTR	155156
chr5	113515628	113515867	2900026A02Rik	3UTR	76466
chr5	114142510	114142629	1700069L16Rik	3UTR	32152
chr5	114142637	114142756	1700069L16Rik	3UTR	32025
chr5	114293533	114293772	Coro1c	3UTR	64943
chr5	114476902	114477261	Svop	3UTR	64128
chr5	114813517	114813756	Myo1h	3UTR	48568
chr5	114881151	114881390	Mmab	3UTR	12646
chr5	114881776	114882135	Mmab	3UTR	11901
chr5	115172007	115172246	Tchp	3UTR	14220
chr5	115177538	115177897	Git2	3UTR	45604
chr5	115547970	115548209	Sppl3	3UTR	86438
chr5	115746537	115746656	Coq5	3UTR	16827
chr5	116004598	116004837	Pxn	3UTR	47888
chr5	116072073	116072312	Gcn1l1	3UTR	56802
chr5	117542757	117542876	Suds3	3UTR	23126
chr5	117827839	117828198	Wsb2	3UTR	20526
chr5	120333388	120333987	Tbx5	3UTR	48717
chr5	120334007	120334366	Tbx5	3UTR	49336
chr5	122017925	122018044	Aldh2	3UTR	25789
chr5	122832545	122832664	Gpn3	3UTR	10029
chr5	123183515	123183754	Camkk2	3UTR	45665
chr5	123183805	123183924	Camkk2	3UTR	45495
chr5	124314118	124314357	Niacr1	3UTR	1168
chr5	124326957	124327196	Gpr81	3UTR	2833
chr5	124328036	124328275	Gpr81	3UTR	1754
chr5	124910944	124911183	Setd8	3UTR	21006
chr5	125021075	125021314	Eif2b1	3UTR	7752
chr5	125497500	125498089	Ncor2	3UTR	161495
chr5	125498139	125498258	Ncor2	3UTR	161326
chr5	129491985	129492104	Stx2	3UTR	22335
chr5	134714470	134714709	Gtf2i	3UTR	75907
chr5	138395921	138396040	Gjc3	3UTR	8147
chr5	138707466	138707585	6330418K02Rik	3UTR	2194
chr5	139452879	139453238	Pdgfa	3UTR	17669
chr5	140803887	140804246	Ftsj2	3UTR	3606
chr5	141236129	141236368	Gna12	3UTR	70017
chr5	141236387	141236506	Gna12	3UTR	69879
chr5	142689121	142689360	Sdk1	3UTR	971634
chr5	143633982	143634101	Fbxl18	3UTR	22816
chr5	144324813	144324932	Fam220a	3UTR	15240
chr5	144948586	144948945	Lmtk2	3UTR	87282
chr5	145744656	145744895	Kpna7	3UTR	25610
chr5	145869194	145869553	Arpc1a	3UTR	24457
chr5	147546737	147546976	Usp12	3UTR	59556
chr5	147547920	147548399	Usp12	3UTR	58133
chr5	147549024	147549383	Usp12	3UTR	57149
chr5	149931093	149931212	5730422E09Rik	3UTR	62400
chr4	5725601	5725720	Fam110b	3UTR	154276
chr4	19533500	19533739	Rmdn1	3UTR	31288
chr4	22415292	22415411	Pou3f2	3UTR	102
chr4	32109477	32109716	Map3k7	3UTR	58396
chr4	32109742	32109861	Map3k7	3UTR	58661
chr4	32861648	32861887	Mdn1	3UTR	117555
chr4	32892645	32892884	Ankrd6	3UTR	144917
chr4	33319472	33319711	Srsf12	3UTR	23507
chr4	34854274	34854633	Cga	3UTR	13247
chr4	40145228	40145467	Aco1	3UTR	54931
chr4	40263631	40263870	4930509K18Rik	3UTR	3367
chr4	40633367	40633726	Aptx	3UTR	16494
chr4	41443123	41443362	AI464131	3UTR	6746
chr4	43040669	43040908	Stoml2	3UTR	3348
chr4	45006088	45006207	Zbtb5	3UTR	19077
chr4	45736275	45736514	Gm829	3UTR	39815
chr4	46550697	46551056	Coro2a	3UTR	63745
chr4	47325473	47325832	Col15a1	3UTR	104590
chr4	47495882	47496001	Sec61b	3UTR	8350
chr4	55093872	55094231	Zfp462	3UTR	133056
chr4	55095307	55095546	Zfp462	3UTR	134491
chr4	56752868	56752987	Actl7b	3UTR	1310
chr4	56892913	56893032	Tmem245	3UTR	67269
chr4	57921995	57922234	D630039A03Rik	3UTR	6902
chr4	57996792	57997031	Txndc8	3UTR	24965
chr4	62320274	62320393	Rgs3	3UTR	99394
chr4	62320416	62320655	Rgs3	3UTR	99536
chr4	82445605	82445844	Zdhhc21	3UTR	59721
chr4	86565673	86565912	Acer2	3UTR	45356
chr4	95710056	95710295	Cyp2j13	3UTR	33936
chr4	100823146	100823265	Raver2	3UTR	81504
chr4	104414492	104414731	Dab1	3UTR	374317
chr4	106113059	106113418	Usp24	3UTR	124242
chr4	106259327	106259446	Dhcr24	3UTR	25685
chr4	106810193	106810312	Tceanc2	3UTR	40659
chr4	108231363	108231482	Zcchc11	3UTR	99333
chr4	108734594	108734713	Osbpl9	3UTR	140164
chr4	117541699	117541818	Slc6a9	3UTR	33837
chr4	117546389	117546748	B4galt2	3UTR	9333
chr4	117882223	117882582	Ptprf	3UTR	81420
chr4	118809005	118809124	Slc2a1	3UTR	27656
chr4	118949954	118950193	Ybx1	3UTR	16925
chr4	122869017	122869136	Hpcal4	3UTR	8271
chr4	122869340	122869459	Hpcal4	3UTR	8594
chr4	122869657	122869776	Hpcal4	3UTR	8911
chr4	122869819	122869938	Hpcal4	3UTR	9073
chr4	122871116	122871475	Hpcal4	3UTR	10370
chr4	125841498	125841617	Thrap3	3UTR	38337
chr4	126017987	126018226	Ago3	3UTR	88560
chr4	130168253	130168492	Nkain1	3UTR	42549
chr4	131458603	131458962	Gm12992	3UTR	16982
chr4	132334168	132334407	Rpa2	3UTR	9894
chr4	132751704	132751943	Wasf2	3UTR	65157
chr4	133403529	133403648	Rps6ka1	3UTR	40066
chr4	133983081	133983320	Pafah2	3UTR	30807
chr4	134968380	134968619	Rcan3	3UTR	21101
chr4	135184037	135184276	1700029M20Rik	3UTR	1468
chr4	135309718	135310077	Il22ra1	3UTR	25645
chr4	136852765	136852884	Wnt4	3UTR	19216
chr4	137127004	137127363	Ldlrad2	3UTR	3732
chr4	137212626	137212745	Usp48	3UTR	62523
chr4	137762063	137762182	Eif4g3	3UTR	212693
chr4	138731611	138731850	Gm16287	3UTR	4720
chr4	138846795	138847394	Capzb	3UTR	97982
chr4	138874440	138874679	Akr7a5	3UTR	7782
chr4	140278337	140278576	Rcc2	3UTR	20950
chr4	140283226	140283465	Padi6	3UTR	15093
chr4	140507548	140507907	Padi2	3UTR	45274
chr4	140508261	140508620	Padi2	3UTR	45987
chr4	140980583	140980702	Hspb7	3UTR	3890
chr4	140980709	140980948	Hspb7	3UTR	4016
chr4	140988585	140988704	Gm694	3UTR	3316
chr4	141023830	141024069	Spen	3UTR	70443
chr4	141024146	141024505	Spen	3UTR	70007
chr4	141415439	141415558	Efhd2	3UTR	15277
chr4	142697131	142697490	Prdm2	3UTR	105122
chr4	142697534	142697653	Prdm2	3UTR	104959
chr4	147195995	147196234	Rps19-ps3	3UTR	77
chr4	149118427	149118666	Slc25a33	3UTR	29710
chr4	149270320	149270559	Spsb1	3UTR	58556
chr4	149272194	149272313	Spsb1	3UTR	56802
chr4	149476681	149476800	Gpr157	3UTR	15070
chr4	150378888	150379247	Per3	3UTR	39484
chr4	151435508	151435627	Nol9	3UTR	22073
chr4	151765015	151765134	Kcnab2	3UTR	86524
chr4	151766815	151767174	Kcnab2	3UTR	84484
chr4	153395299	153395418	Lrrc47	3UTR	9388
chr4	153692869	153693228	Prdm16	3UTR	317754
chr4	154354731	154354970	Pank4	3UTR	16490
chr4	154528342	154528581	Ski	3UTR	68063
chr4	154530738	154531217	Ski	3UTR	65427
chr4	154634226	154634345	Prkcz	3UTR	101155
chr4	154635917	154636396	Prkcz	3UTR	99104
chr4	155603984	155604223	Klhl17	3UTR	4743
chr3	7442001	7442240	Pkia	3UTR	75398
chr3	8462085	8462444	Gm6194	3UTR	654
chr3	9692284	9692403	Pag1	3UTR	141276
chr3	14900127	14900246	Car2	3UTR	13702
chr3	30798393	30798632	Phc3	3UTR	69705
chr3	30805981	30806100	Phc3	3UTR	62237
chr3	30806118	30806357	Phc3	3UTR	61980
chr3	32235311	32235430	Zmat3	3UTR	29157
chr3	32239685	32239924	Zmat3	3UTR	24663
chr3	37542599	37542838	Spry1	3UTR	3728
chr3	40870882	40871121	Pgrmc2	3UTR	15847
chr3	57262571	57262930	Wwtr1	3UTR	116902
chr3	79435389	79435748	4930579G24Rik	3UTR	2389
chr3	87582261	87582380	Ntrk1	3UTR	16704
chr3	88713662	88713901	Gon4l	3UTR	74510
chr3	89137271	89137510	Efna4	3UTR	4440
chr3	89219595	89220062	Cks1b	3UTR	2151
chr3	89471502	89471621	Kcnn3	3UTR	147417
chr3	89475646	89475885	Kcnn3	3UTR	151561
chr3	89674339	89674698	Il6ra	3UTR	42386
chr3	89904591	89904950	Tpm3	3UTR	28019
chr3	94305057	94305296	Snx27	3UTR	81328
chr3	95749078	95749317	Anp32e	3UTR	15899
chr3	96448279	96448518	Pex11b	3UTR	9000
chr3	97951749	97951988	Notch2	3UTR	134289
chr3	100368469	100368764	Man1a2	3UTR	120632
chr3	100699768	100700007	Vtcn1	3UTR	70387
chr3	100846465	100846584	Ptgfrn	3UTR	67505
chr3	103158975	103159334	Trim33	3UTR	75760
chr3	108160044	108160283	Sort1	3UTR	73063
chr3	108162201	108162440	Sort1	3UTR	75220
chr3	108229069	108229308	Sars	3UTR	18869
chr3	115631881	115632000	Dph5	3UTR	40781
chr3	115649396	115649635	Slc30a7	3UTR	60689
chr3	121437104	121437463	F3	3UTR	10650
chr3	125427703	125427822	Ndst4	3UTR	320695
chr3	129338311	129338550	Elovl6	3UTR	103008
chr3	130298651	130299010	Col25a1	3UTR	414889
chr3	131306194	131306313	Papss1	3UTR	78463
chr3	134936160	134936279	Cenpe	3UTR	60634
chr3	134936303	134936422	Cenpe	3UTR	60777
chr3	135247961	135248200	Nfkb1	3UTR	106311
chr3	138050820	138050939	Adh6-ps1	3UTR	13736
chr3	138375521	138375640	4930425O10Rik	3UTR	14308
chr3	141904261	141904609	Pdlim5	3UTR	154051
chr3	142185006	142185365	Gbp5	3UTR	25109
chr3	145554916	145555155	Ddah1	3UTR	133261
chr3	145948148	145948267	Lpar3	3UTR	64224
chr3	146101801	146101920	Ssx2ip	3UTR	34196
chr3	151936317	151936556	Fam73a	3UTR	66815
chr3	153996037	153996156	AI606473	3UTR	2253
chr3	156976069	156976188	Negr1	3UTR	751312
chr2	6363000	6363239	Usp6nl	3UTR	119198
chr2	6463920	6464159	Celf2	3UTR	853666
chr2	9779733	9779852	Gata3	3UTR	20375
chr2	11711706	11711825	Ankrd16	3UTR	12327
chr2	13198278	13198397	Cubn	3UTR	215106
chr2	18765752	18765991	Pip4k2a	3UTR	153757
chr2	20891865	20891984	Gm13375	3UTR	1365
chr2	26238643	26238762	Sdccag3	3UTR	6074
chr2	26967052	26967531	Fam163b	3UTR	30466
chr2	28085098	28085457	Olfm1	3UTR	36486
chr2	28085620	28085979	Olfm1	3UTR	37008
chr2	29927455	29927694	Set	3UTR	9940
chr2	29954143	29954382	Zer1	3UTR	25592
chr2	31147799	31148158	Ncs1	3UTR	46357
chr2	31663624	31663743	Qrfp	3UTR	2295
chr2	32643756	32643875	Stxbp1	3UTR	58882
chr2	32644593	32644832	Stxbp1	3UTR	57925
chr2	32644848	32644967	Stxbp1	3UTR	57790
chr2	33264407	33264646	Zbtb34	3UTR	22198
chr2	34479547	34479906	Mapkap1	3UTR	192003
chr2	35891872	35892111	Ndufa8	3UTR	12701
chr2	59221647	59221886	5330411J11Rik	3UTR	2853
chr2	63815158	63815397	Fign	3UTR	120698
chr2	63816377	63816616	Fign	3UTR	119479
chr2	65868637	65868876	Csrnp3	3UTR	184814
chr2	68048411	68048650	Stk39	3UTR	261388
chr2	69521825	69521944	Klhl41	3UTR	13649
chr2	70529224	70529343	Gorasp2	3UTR	29659
chr2	70977306	70977425	Cybrd1	3UTR	21196
chr2	73452631	73452990	Gm13704	3UTR	18049
chr2	84649853	84649972	Ube2l6	3UTR	10869
chr2	84650056	84650175	Ube2l6	3UTR	11072
chr2	90730494	90730613	C1qtnf4	3UTR	4552
chr2	91822681	91822800	Creb3l1	3UTR	41527
chr2	102291867	102291986	Fjx1	3UTR	82
chr2	103294727	103295086	Cat	3UTR	30224
chr2	103983307	103983546	D430041D05Rik	3UTR	266945
chr2	103984249	103984488	D430041D05Rik	3UTR	266003
chr2	113672652	113672771	Arhgap11a	3UTR	16047
chr2	115900373	115900732	2810405F15Rik	3UTR	1100
chr2	119123374	119123733	Vps18	3UTR	8897
chr2	122421030	122421389	Gatm	3UTR	15624
chr2	125083293	125083412	Dut	3UTR	10310
chr2	125126849	125126968	Fbn1	3UTR	205206
chr2	125127125	125127244	Fbn1	3UTR	204930
chr2	125565327	125565686	Secisbp2l	3UTR	42920
chr2	127984181	127984300	Bcl2l11	3UTR	32408
chr2	127987719	127987838	Bcl2l11	3UTR	35946
chr2	128752421	128752540	Zc3h8	3UTR	17216
chr2	128920008	128920367	Ttl	3UTR	28326
chr2	140030135	140030374	Ndufaf5	3UTR	33754
chr2	144105274	144105513	Mgme1	3UTR	8504
chr2	151543929	151544270	Psmf1	3UTR	22759
chr2	152720582	152720821	Tpx2	3UTR	46883
chr2	154412832	154413071	Pxmp4	3UTR	16338
chr2	156218384	156218503	2900097C17Rik	3UTR	212
chr2	156365575	156365814	Epb4.1l1	3UTR	118788
chr2	156698647	156699109	1110008F13Rik	3UTR	9790
chr2	157383001	157383360	Blcap	3UTR	8737
chr2	158208055	158208174	Snhg11	3UTR	6682
chr2	158683476	158683715	Dhx35	3UTR	62921
chr2	160137326	160137565	Gm826	3UTR	15665
chr2	165596871	165597208	Eya2	3UTR	176344
chr2	165609978	165610097	Zmynd8	3UTR	100154
chr2	166392145	166392504	Prex1	3UTR	146828
chr2	166721982	166722101	Arfgef2	3UTR	90902
chr2	166926492	166926851	Kcnb1	3UTR	87467
chr2	166928407	166928766	Kcnb1	3UTR	85552
chr2	167802969	167803208	Ptpn1	3UTR	45143
chr2	167926431	167926550	Pard6b	3UTR	19928
chr2	169712153	169712272	Tshz2	3UTR	253008
chr2	172258062	172258301	Cass4	3UTR	38769
chr2	172694330	172695032	Bmp7	3UTR	70790
chr2	173603872	173604111	Vapb	3UTR	40801
chr2	174532566	174532925	Zfp831	3UTR	63532
chr2	179633513	179633872	Cdh4	3UTR	456331
chr2	179647993	179648112	Taf4a	3UTR	63239
chr2	180357076	180357315	Tcfl5	3UTR	20081
chr2	180810390	180810629	Kcnq2	3UTR	59301
chr2	181041256	181041375	Stmn3	3UTR	7830
chr1	20723960	20724079	Il17a	3UTR	2975
chr1	20928096	20928335	Paqr8	3UTR	47394
chr1	34364768	34365007	Dst	3UTR	399699
chr1	34365076	34365315	Dst	3UTR	400007
chr1	34692547	34692906	AA619741	3UTR	149
chr1	34872268	34872507	Fam168b	3UTR	27388
chr1	36197721	36197960	Uggt1	3UTR	103187
chr1	39608650	39609009	Rnf149	3UTR	25183
chr1	42962376	42962495	Mrps9	3UTR	54299
chr1	56851189	56851428	Satb2	3UTR	176750
chr1	56852145	56852264	Satb2	3UTR	175914
chr1	56852645	56852884	Satb2	3UTR	175294
chr1	58012970	58013209	Kctd18	3UTR	13719
chr1	59051576	59051695	Stradb	3UTR	21162
chr1	63104356	63104475	Ino80d	3UTR	56366
chr1	65118046	65118285	Crygc	3UTR	1821
chr1	65154183	65154422	D630023F18Rik	3UTR	15345
chr1	72005879	72006118	4933417E11Rik	3UTR	45651
chr1	72474037	72474156	2015-03-04	3UTR	108982
chr1	72474278	72474517	2015-03-04	3UTR	108621
chr1	80498109	80498228	Dock10	3UTR	256900
chr1	88426617	88426736	Ptma	3UTR	3307
chr1	88426780	88426899	Ptma	3UTR	3470
chr1	89616026	89616265	Inpp5d	3UTR	99140
chr1	93308057	93308296	Hes6	3UTR	1503
chr1	93829724	93829843	Hdac4	3UTR	215127
chr1	95261529	95261768	Ppp1r7	3UTR	21308
chr1	108620701	108620940	Kdsr	3UTR	35379
chr1	120197292	120197411	Tsn	3UTR	10298
chr1	121312552	121312791	Inhbb	3UTR	6034
chr1	153737450	153737689	1700025G04Rik	3UTR	199761
chr1	154217895	154218134	Tsen15	3UTR	15678
chr1	154686008	154686367	Smg7	3UTR	63409
chr1	156245388	156245507	Cacna1e	3UTR	327543
chr1	158609722	158609961	Fam20b	3UTR	39080
chr1	163171627	163171866	Prdx6	3UTR	9431
chr1	163919641	163919880	Dnm3	3UTR	488281
chr1	163920743	163920982	Dnm3	3UTR	487179
chr1	164579608	164579847	Myoc	3UTR	10328
chr1	172248540	172248659	Nos1ap	3UTR	271321
chr1	173165012	173165251	Ndufs2	3UTR	11992
chr1	174140230	174140469	Casq1	3UTR	9557
chr1	174428885	174429004	Igsf9	3UTR	16542
chr1	180885767	180886006	Smyd3	3UTR	562128
chr1	181458761	181459000	Tfb2m	3UTR	17398
chr1	181675193	181675432	Ahctf1	3UTR	58714
chr1	182362687	182362926	6330403A02Rik	3UTR	50709
chr1	182620022	182620141	Lin9	3UTR	48558
chr1	184061902	184062381	Srp9	3UTR	7035
chr1	186720484	186720723	Mark1	3UTR	102705
chr1	186721332	186721451	Mark1	3UTR	101977
chr1	186721501	186721860	Mark1	3UTR	101568
chr1	189173741	189173980	Gpatch2	3UTR	134352
chr1	189175053	189175292	Gpatch2	3UTR	135664
chr1	191696675	191696914	Ptpn14	3UTR	144529
chr1	192769916	192770155	Angel2	3UTR	20930
chr1	193173716	193173955	Tmem206	3UTR	23873
chrx	6952434	6952553	Usp27x	3UTR	403
chrx	7309661	7309780	Ccdc120	3UTR	8670
chrx	7309862	7309981	Ccdc120	3UTR	8469
chrx	8553224	8553884	Gm14511	3UTR	461
chrx	8563396	8564053	Gm14458	3UTR	402
chrx	50096853	50097092	Kis2	3UTR	678
chrx	54045389	54045628	Fhl1	3UTR	60426
chrx	92041304	92041543	Zxda	3UTR	2085
chrx	92041575	92042534	Zxda	3UTR	1094
chrx	92042778	92042897	Zxda	3UTR	731
chrx	92042982	92043101	Zxda	3UTR	527
chrx	92043255	92043974	Zxda	3UTR	373
chrx	98011929	98012168	Dlg3	3UTR	48868
chrx	98580781	98580900	Gjb1	3UTR	8106
chrx	104033042	104033521	Zcchc5	3UTR	2461
chrx	138739892	138740011	Kcne1l	3UTR	730
chr9	7673061	7673300	Mmp20	3UTR	44831
chr9	7934152	7934511	Yap1	3UTR	70085
chr9	14129993	14130352	Sesn3	3UTR	49249
chr9	14347268	14347387	Amotl1	3UTR	72057
chr9	14347400	14347639	Amotl1	3UTR	71805
chr9	20678212	20678331	A230050P20Rik	3UTR	5127
chr9	21209290	21209649	Ilf3	3UTR	36976
chr9	21392626	21392865	Carm1	3UTR	41289
chr9	21712864	21713103	Rab3d	3UTR	9462
chr9	31082345	31082584	Gm7244	3UTR	3360
chr9	42221170	42221409	Tbcel	3UTR	58900
chr9	42772511	42772750	Arhgef12	3UTR	141051
chr9	43919615	43919854	Rnf26	3UTR	1280
chr9	44445224	44445343	Ddx6	3UTR	32250
chr9	44611954	44612193	Kmt2a	3UTR	77164
chr9	45203194	45203433	Fxyd6	3UTR	24927
chr9	75485244	75485363	Lysmd2	3UTR	11706
chr9	77279750	77279869	Lrrc1	3UTR	112790
chr9	77830615	77830854	Elovl5	3UTR	65444
chr9	78016968	78017087	Ick	3UTR	59970
chr9	89921459	89921818	Rasgrf1	3UTR	116847
chr9	90094688	90094807	Adamts7	3UTR	36873
chr9	90097497	90097736	Tbc1d2b	3UTR	67871
chr9	99374874	99374993	1600029I14Rik	3UTR	4035
chr9	99379186	99379425	Armc8	3UTR	89893
chr9	100358896	100359375	Il20rb	3UTR	27517
chr9	101825056	101825175	Ephb1	3UTR	431848
chr9	102536273	102536752	Anapc13	3UTR	7648
chr9	102988174	102988518	Slco2a1	3UTR	77356
chr9	103085182	103085301	Rab6b	3UTR	70779
chr9	107203202	107203321	Cish	3UTR	4183
chr9	107516407	107516646	Gnai2	3UTR	21027
chr9	110817298	110817417	Gm590	3UTR	1948
chr9	110886035	110886274	Lrrc2	3UTR	31987
chr9	113561675	113561914	Pdcd6ip	3UTR	55463
chr9	113884953	113885312	Ubp1	3UTR	44902
chr9	115999150	115999389	Tgfbr2	3UTR	85092
chr9	119057181	119057420	Acaa1b	3UTR	8791
chr9	119663143	119663382	Scn11a	3UTR	71192
chr9	119834482	119834841	Wdr48	3UTR	30470
chr9	119876784	119876903	Ttc21a	3UTR	30061
chr9	120083221	120083460	Mobp	3UTR	24362
chr9	120084963	120085202	Mobp	3UTR	26104
chr8	3389946	3390185	A430078G23Rik	3UTR	36532
chr8	4246795	4247034	Map2k7	3UTR	8056
chr8	10035118	10035837	Tnfsf13b	3UTR	28486
chr8	11199540	11199659	Col4a1	3UTR	113167
chr8	12708587	12708706	Gm15348	3UTR	10421
chr8	13256443	13256682	Dcun1d2	3UTR	31444
chr8	13257413	13257772	Dcun1d2	3UTR	30354
chr8	13420951	13421070	Grk1	3UTR	15871
chr8	14899327	14899566	Cln8	3UTR	10792
chr8	19865136	19865495	6820431F20Rik	3UTR	27515
chr8	23105030	23105149	Atp7b	3UTR	65397
chr8	26269839	26270318	Tacc1	3UTR	41603
chr8	26825214	26825333	Whsc1l1	3UTR	74459
chr8	34346491	34346730	Wrn	3UTR	149269
chr8	34807873	34807992	Gsr	3UTR	44164
chr8	35198858	35199216	Leprotl1	3UTR	10577
chr8	35200702	35200821	Leprotl1	3UTR	8972
chr8	36739664	36740023	Mfhas1	3UTR	88813
chr8	36741753	36741992	Mfhas1	3UTR	90902
chr8	36928426	36928785	5430403N17Rik	3UTR	17226
chr8	37632799	37633518	Dlc1	3UTR	381978
chr8	38586030	38586389	Sgcz	3UTR	1138173
chr8	42078046	42078285	Mtus1	3UTR	140795
chr8	47619685	47620164	Acsl1	3UTR	63290
chr8	48266392	48266751	Stox2	3UTR	170951
chr8	49225684	49225923	Dctd	3UTR	41239
chr8	49226042	49226281	Dctd	3UTR	41597
chr8	63391373	63391612	Clcn3	3UTR	70496
chr8	67492737	67492976	Tmem192	3UTR	21654
chr8	72432547	72432786	Gatad2a	3UTR	87492
chr8	72817750	72817869	Homer3	3UTR	10853
chr8	72906121	72906599	Crtc1	3UTR	56873
chr8	72909858	72910097	Crtc1	3UTR	53375
chr8	73115464	73115703	Ell	3UTR	51891
chr8	74457648	74457887	Zfp617	3UTR	10925
chr8	75002601	75002840	Slc35e1	3UTR	13673
chr8	79766288	79766647	Nr3c2	3UTR	339882
chr8	86193400	86193759	Ptger1	3UTR	2862
chr8	87195755	87195994	Nacc1	3UTR	15767
chr8	87553948	87554067	2310036O22Rik	3UTR	3217
chr8	90112998	90113117	4933402J07Rik	3UTR	25193
chr8	90781055	90781414	Papd5	3UTR	57944
chr8	90782450	90782809	Papd5	3UTR	59339
chr8	95521628	95521867	Slc6a2	3UTR	36683
chr8	97197767	97197886	Arl2bp	3UTR	7113
chr8	106878071	106878190	Cmtm4	3UTR	41517
chr8	106943941	106944180	Dync1li2	3UTR	22767
chr8	107782412	107782651	Tradd	3UTR	5843
chr8	108293176	108293415	Ranbp10	3UTR	57835
chr8	108402787	108402906	Nutf2-ps1	3UTR	18228
chr8	109410013	109410372	Chtf8	3UTR	7121
chr8	109593516	109593755	Terf2	3UTR	26690
chr8	109594077	109594316	Terf2	3UTR	26129
chr8	109709389	109709628	Cyb5b	3UTR	34829
chr8	109710793	109711032	Cyb5b	3UTR	36233
chr8	113265167	113265406	Mtss1l	3UTR	19784
chr8	116166828	116167187	Mon1b	3UTR	7343
chr8	119464783	119465142	Cenpn	3UTR	19144
chr8	119728519	119728758	Gan	3UTR	46485
chr8	119728784	119729143	Gan	3UTR	46750
chr8	119983284	119983523	Cmip	3UTR	202366
chr8	119983657	119984016	Cmip	3UTR	202739
chr8	121872201	121872320	Hsbp1	3UTR	3764
chr8	122281472	122281591	Atp2c2	3UTR	57564
chr8	123102806	123103045	Gse1	3UTR	90041
chr8	123105239	123105478	Gins2	3UTR	7497
chr8	124120565	124120804	Map1lc3b	3UTR	6198
chr8	124122660	124122779	Zcchc14	3UTR	53054
chr8	124124991	124125110	Zcchc14	3UTR	50723
chr8	124125226	124125585	Zcchc14	3UTR	50248
chr8	124125671	124126030	Zcchc14	3UTR	49803
chr8	124440151	124440390	BC048644	3UTR	8419
chr8	124551020	124551259	Banp	3UTR	76588
chr8	125154129	125154248	Cbfa2t3	3UTR	68761
chr8	126187385	126187504	Rhou	3UTR	9557
chr8	126187544	126187783	Rhou	3UTR	9716
chr8	126365002	126365361	Ccsap	3UTR	18748
chr8	126365528	126365767	Ccsap	3UTR	18342
chr8	126867223	126867582	Galnt2	3UTR	111930
chr8	127419251	127419490	Exoc8	3UTR	2115
chr8	127433936	127434175	Egln1	3UTR	38979
chr8	127557689	127557808	Tsnax	3UTR	20793
chr8	128271635	128271754	Ntpcr	3UTR	13533
chr8	128271925	128272044	Ntpcr	3UTR	13823
chr8	128275762	128275881	Pcnxl2	3UTR	146312
chr8	128470581	128470700	BC021891	3UTR	36232
chr8	128470792	128470911	BC021891	3UTR	36443
chr13	19241656	19241895	Amph	3UTR	201417
chr13	30337986	30338345	Mboat1	3UTR	109628
chr13	34271538	34271777	Slc22a23	3UTR	165274
chr13	35964443	35964682	Cdyl	3UTR	212713
chr13	38041453	38041692	Rreb1	3UTR	122673
chr13	38064332	38064571	Ssr1	3UTR	21488
chr13	38068575	38068814	Ssr1	3UTR	17245
chr13	41053962	41054201	Gcnt2	3UTR	98826
chr13	41054223	41054342	Gcnt2	3UTR	99087
chr13	41054365	41054724	Gcnt2	3UTR	99229
chr13	41121481	41121960	Mak	3UTR	53115
chr13	43233508	43233627	Phactr1	3UTR	457517
chr13	51796610	51797084	Sema4d	3UTR	91929
chr13	52741138	52741377	Syk	3UTR	62333
chr13	55106937	55107056	Unc5a	3UTR	56145
chr13	55107172	55107513	Unc5a	3UTR	56380
chr13	55782197	55782436	Ddx46	3UTR	45810
chr13	55801461	55801580	B230219D22Rik	3UTR	6977
chr13	56175071	56175190	H2afy	3UTR	61721
chr13	58264797	58265276	Idnk	3UTR	5788
chr13	58482184	58482543	2210016F16Rik	3UTR	4043
chr13	59230234	59230353	Ntrk2	3UTR	321041
chr13	59857159	59857398	Isca1	3UTR	13752
chr13	68700200	68700439	Mtrr	3UTR	20559
chr13	72762101	72762340	Gm20554	3UTR	3672
chr13	89796091	89796330	Vcan	3UTR	85787
chr13	91840201	91840440	Ssbp2	3UTR	239500
chr13	95792609	95792848	Wdr41	3UTR	46311
chr13	97186279	97186398	Ankdd1b	3UTR	54717
chr13	97186471	97186590	Ankdd1b	3UTR	54525
chr13	97407072	97407191	Col4a3bp	3UTR	94383
chr13	98021131	98021370	Enc1	3UTR	10072
chr13	99194148	99194387	2310005E17Rik	3UTR	10633
chr13	100191512	100191991	Map1b	3UTR	94566
chr13	100193653	100193892	Map1b	3UTR	92665
chr13	100907314	100907673	Smn1	3UTR	14155
chr13	101468845	101469084	Cdk7	3UTR	31813
chr13	101529719	101529958	Cenph	3UTR	15896
chr13	102454174	102454413	Pik3r1	3UTR	83759
chr13	104814792	104814911	Nln	3UTR	84783
chr13	104933092	104933331	Trappc13	3UTR	35215
chr13	108515493	108515732	Zswim6	3UTR	164526
chr13	109178848	109178967	Depdc1b	3UTR	72318
chr13	109179001	109179120	Depdc1b	3UTR	72471
chr13	109179354	109179713	Depdc1b	3UTR	72824
chr13	110845134	110845373	Rab3c	3UTR	225041
chr13	110851433	110851672	Rab3c	3UTR	218742
chr13	112507949	112508188	Mier3	3UTR	31564
chr13	113528325	113528684	Slc38a9	3UTR	77352
chr13	114006967	114007086	Esm1	3UTR	7101
chr12	5050875	5051234	Atad2b	3UTR	126717
chr12	5051301	5051420	Atad2b	3UTR	127143
chr12	5087636	5087995	Klhl29	3UTR	294493
chr12	16677648	16677887	Greb1	3UTR	129805
chr12	16832160	16832519	E2f6	3UTR	14390
chr12	26994585	26994824	Rnf144a	3UTR	105297
chr12	27163437	27163796	Cmpk2	3UTR	9358
chr12	33796748	33796867	F730043M19Rik	3UTR	35584
chr12	37904924	37905043	Meox2	3UTR	69792
chr12	40903080	40903439	Lsmem1	3UTR	22463
chr12	53100394	53100513	Dtd2	3UTR	6975
chr12	56704960	56705199	Ralgapa1	3UTR	216955
chr12	68761628	68761867	Gm17821	3UTR	8391
chr12	70678821	70678940	Mettl21d	3UTR	5075
chr12	70792192	70792431	L2hgdh	3UTR	33430
chr12	70953129	70953368	4931403G20Rik	3UTR	8457
chr12	71346053	71346292	Trim9	3UTR	102309
chr12	72002884	72003123	Frmd6	3UTR	76384
chr12	73091372	73091611	Daam1	3UTR	159308
chr12	74204039	74204278	Six4	3UTR	9954
chr12	74652011	74652610	2210039B01Rik	3UTR	2542
chr12	81437926	81438165	Dcaf5	3UTR	99423
chr12	83101169	83101408	Pcnx	3UTR	140153
chr12	83101556	83101795	Pcnx	3UTR	140540
chr12	85687562	85687921	Fam161b	3UTR	14850
chr12	85935657	85935896	Vsx2	3UTR	24856
chr12	86096070	86096189	Npc2	3UTR	17873
chr12	86508100	86508219	Pgf	3UTR	10044
chr12	86684097	86684216	Tmed10	3UTR	31451
chr12	86817388	86817627	Fos	3UTR	2538
chr12	92795433	92795792	Gtf2a1	3UTR	33135
chr12	93045545	93045664	Sel1l	3UTR	41933
chr12	93045867	93046226	Sel1l	3UTR	41371
chr12	99442006	99442245	Galc	3UTR	55302
chr12	99915881	99916000	Ptpn21	3UTR	59615
chr12	101539165	101539404	Ttc7b	3UTR	219628
chr12	101789470	101789589	Rps6ka5	3UTR	173649
chr12	104014303	104014422	Ubr7	3UTR	18119
chr12	104014464	104014583	Ubr7	3UTR	18280
chr12	104642420	104642539	Otub2	3UTR	27317
chr12	106268916	106269035	Snhg10	3UTR	1454
chr12	106633971	106634210	Gm2721	3UTR	7760
chr12	107314463	107314582	Vrk1	3UTR	65991
chr12	108962140	108962259	4930465M20Rik	3UTR	11439
chr12	109777180	109777299	Eml1	3UTR	128316
chr12	110265744	110265983	Wdr25	3UTR	133263
chr12	110701074	110701313	Dlk1	3UTR	10042
chr12	112501199	112501438	Traf3	3UTR	96441
chr12	112532233	112532352	Cdc42bpb	3UTR	83577
chr12	112893849	112894208	Mark3	3UTR	81129
chr12	113181192	113181311	5033406O09Rik	3UTR	1382
chr12	114427349	114427563	Tmem121	3UTR	3236
chr11	5865996	5866235	Ykt6	3UTR	10236
chr11	5871668	5871787	Camk2b	3UTR	93964
chr11	6328148	6328507	H2afv	3UTR	15939
chr11	17134795	17135034	Wdr92	3UTR	22900
chr11	20550035	20550154	Sertad2	3UTR	106780
chr11	21895697	21896056	Otx1	3UTR	5598
chr11	24072662	24073021	Bcl11a	3UTR	94607
chr11	31957682	31957921	Nsg2	3UTR	57224
chr11	31958050	31958169	Nsg2	3UTR	57592
chr11	34623038	34623157	Spdl1	3UTR	23986
chr11	35820832	35821071	Tenm2	3UTR	936674
chr11	35821473	35821592	Tenm2	3UTR	936153
chr11	44378144	44378503	Rnf145	3UTR	45679
chr11	44916787	44916906	Gm12159	3UTR	13524
chr11	44917004	44917123	Gm12159	3UTR	13307
chr11	45746707	45746946	Lsm11	3UTR	11491
chr11	45957193	45957537	Adam19	3UTR	87705
chr11	55046311	55046550	Slc36a1	3UTR	28470
chr11	55049131	55049370	Slc36a1	3UTR	31290
chr11	55049508	55049747	Slc36a1	3UTR	31667
chr11	59598507	59598746	Pld6	3UTR	2413
chr11	60012197	60012556	Rai1	3UTR	93683
chr11	60527749	60527868	Flii	3UTR	12855
chr11	61685768	61686007	Akap10	3UTR	57752
chr11	63777169	63777408	Cox10	3UTR	115566
chr11	66030335	66030574	Shisa6	3UTR	309054
chr11	69212784	69213023	Kdm6b	3UTR	14154
chr11	72738319	72738438	Zzef1	3UTR	128592
chr11	76509866	76510225	Tusc5	3UTR	16492
chr11	76800617	76800736	Blmh	3UTR	41460
chr11	80694153	80694512	Asic2	3UTR	1087386
chr11	82685761	82686106	Rad51d	3UTR	18020
chr11	83232755	83232994	Rasl10b	3UTR	9182
chr11	84214993	84215112	Acaca	3UTR	206054
chr11	86750491	86750610	Ypel2	3UTR	56654
chr11	86750674	86750793	Ypel2	3UTR	56471
chr11	88881087	88881326	Trim25	3UTR	20371
chr11	93807358	93807477	Mbtd1	3UTR	59826
chr11	94402599	94402718	Rsad1	3UTR	7803
chr11	94906172	94906531	Itga3	3UTR	31497
chr11	94906897	94907016	Itga3	3UTR	31012
chr11	95823934	95824173	Igf2bp1	3UTR	43085
chr11	96026098	96026337	Ttll6	3UTR	30999
chr11	96959457	96959696	Tbx21	3UTR	16949
chr11	97255598	97255717	Socs7	3UTR	31734
chr11	97578131	97578370	Pip4k2b	3UTR	27648
chr11	97579255	97579494	Pip4k2b	3UTR	26524
chr11	98187199	98187798	Neurod2	3UTR	3161
chr11	99177135	99177254	Krt25	3UTR	7001
chr11	99898813	99899052	Krt34	3UTR	3816
chr11	100745667	100745786	Stat5a	3UTR	25003
chr11	100987500	100987619	Tubg1	3UTR	6056
chr11	101319751	101319990	Ifi35	3UTR	10026
chr11	101834535	101834774	Dusp3	3UTR	11331
chr11	102014404	102014763	Tmem101	3UTR	2958
chr11	102166939	102167058	Ubtf	3UTR	13352
chr11	102800814	102801053	C1ql1	3UTR	6722
chr11	103677389	103677508	Wnt3	3UTR	41901
chr11	103677664	103677783	Wnt3	3UTR	42176
chr11	103683434	103683673	Nsf	3UTR	131697
chr11	103684237	103684596	Nsf	3UTR	130774
chr11	104531261	104531620	Itgb3	3UTR	61948
chr11	105143260	105143499	Tlk2	3UTR	100417
chr11	106024340	106024459	Strada	3UTR	30458
chr11	106516373	106516492	Pecam1	3UTR	60103
chr11	106890928	106891407	1810010H24Rik	3UTR	1392
chr11	107069223	107069582	Pitpnc1	3UTR	262452
chr11	107073532	107073771	Pitpnc1	3UTR	258263
chr11	107736300	107736539	Cacng5	3UTR	39830
chr11	107794683	107794802	Prkca	3UTR	410400
chr11	108810782	108810901	Axin2	3UTR	29120
chr11	108811518	108811877	Axin2	3UTR	29856
chr11	109218036	109218275	Gm11696	3UTR	6693
chr11	109261348	109261467	Gna13	3UTR	37241
chr11	109314329	109314688	LOC100503496	3UTR	12938
chr11	113107015	113107254	Slc39a11	3UTR	319875
chr11	115291577	115291936	Kctd2	3UTR	10138
chr11	115506971	115507090	Grb2	3UTR	62821
chr11	115921229	115921468	Unk	3UTR	29594
chr11	116199779	116200018	Rnf157	3UTR	74328
chr11	116735038	116735637	Mfsd11	3UTR	19710
chr11	117222674	117222793	2015-09-09	3UTR	161700
chr11	117622384	117623072	Tnrc6c	3UTR	106782
chr11	117623201	117623440	Tnrc6c	3UTR	107599
chr11	117884601	117884840	Pgs1	3UTR	36431
chr11	118162583	118162822	Timp2	3UTR	53903
chr11	118350218	118350577	Engase	3UTR	11945
chr11	118351204	118351323	Rbfox3	3UTR	419563
chr11	119006316	119006435	Tbc1d16	3UTR	83378
chr11	119125809	119126048	Ccdc40	3UTR	35924
chr10	4533470	4533709	Mtrf1l	3UTR	10873
chr10	7627109	7627348	Tab2	3UTR	48573
chr10	8442628	8442867	Sash1	3UTR	163001
chr10	8444715	8445194	Sash1	3UTR	160674
chr10	9480431	9480550	Stxbp5	3UTR	140288
chr10	10408152	10408391	Grm1	3UTR	393738
chr10	12933892	12934131	Phactr2	3UTR	260071
chr10	21718864	21718983	Sgk1	3UTR	116875
chr10	24890484	24891083	Akap7	3UTR	127886
chr10	28642856	28642975	4930519F09Rik	3UTR	338
chr10	43232643	43232882	Bend3	3UTR	33698
chr10	43232924	43233043	Bend3	3UTR	33979
chr10	52039636	52039995	Dcbld1	3UTR	86212
chr10	58598761	58599000	Sh3rf3	3UTR	322655
chr10	58884195	58884674	Pla2g12b	3UTR	17763
chr10	61597121	61597240	Neurog3	3UTR	1284
chr10	62078879	62078998	Ddx50	3UTR	34948
chr10	62579484	62579723	Mypn	3UTR	86977
chr10	66729965	66730204	Nrbf2	3UTR	17825
chr10	70846906	70847025	Ipmk	3UTR	36366
chr10	74477841	74478080	Gnaz	3UTR	47866
chr10	75503409	75503528	Zfp280b	3UTR	8053
chr10	79002968	79003207	Mier2	3UTR	14629
chr10	79221355	79221763	Rnf126	3UTR	7934
chr10	79652009	79652248	Efna2	3UTR	9783
chr10	79652572	79652691	Efna2	3UTR	10346
chr10	79778806	79779045	Apc2	3UTR	14242
chr10	79843627	79843746	Mex3d	3UTR	6650
chr10	79843819	79843938	Mex3d	3UTR	6458
chr10	80102891	80103130	Csnk1g2	3UTR	17367
chr10	80103282	80103401	Csnk1g2	3UTR	17758
chr10	80484311	80484430	Diras1	3UTR	3692
chr10	80491368	80491607	Slc39a3	3UTR	5050
chr10	80507511	80507870	Sgta	3UTR	15029
chr10	80612130	80612249	Zbtb7a	3UTR	13115
chr10	80612322	80612441	Zbtb7a	3UTR	13307
chr10	80862967	80863206	Nfic	3UTR	26712
chr10	80922109	80922348	Celf5	3UTR	23106
chr10	80922441	80922560	Celf5	3UTR	22894
chr10	80922860	80923099	Celf5	3UTR	22355
chr10	80923396	80923515	Celf5	3UTR	21939
chr10	82111219	82111578	Gm9855	3UTR	18633
chr10	82286401	82286640	1700028I16Rik	3UTR	11534
chr10	82828630	82828749	D10Wsu102e	3UTR	5665
chr10	88412194	88412553	Ano4	3UTR	307982
chr10	89280851	89280970	Uhrf1bp1l	3UTR	73116
chr10	92260563	92260682	Gm872	3UTR	38409
chr10	92260696	92260815	Gm872	3UTR	38276
chr10	92811056	92811175	Gm17745	3UTR	12080
chr10	93430759	93430998	Vezt	3UTR	67495
chr10	94049829	94050068	Tmcc3	3UTR	72228
chr10	94050434	94050673	Tmcc3	3UTR	72833
chr10	94052291	94052530	Tmcc3	3UTR	74690
chr10	99221782	99222021	Csl	3UTR	271
chr10	99222143	99222382	Csl	3UTR	149
chr10	106856911	106857270	Lin7a	3UTR	148025
chr10	107936663	107936902	Syt1	3UTR	511129
chr10	110376334	110376573	Csrp2	3UTR	19103
chr10	111902248	111902727	Kcnc2	3UTR	194070
chr10	114779199	114779918	Tmem19	3UTR	19400
chr10	114888402	114888641	Lgr5	3UTR	136195
chr10	116344014	116344133	Rab3ip	3UTR	43303
chr10	116404720	116404959	D630029K05Rik	3UTR	2925
chr10	117170858	117170977	Slc35e3	3UTR	12437
chr10	117172676	117172915	Slc35e3	3UTR	10499
chr10	117384249	117384593	4933411E08Rik	3UTR	21735
chr10	118639840	118640199	Cand1	3UTR	36912
chr10	119828330	119828689	9230105E05Rik	3UTR	1752
chr10	121026079	121026198	Xpot	3UTR	37174
chr10	121188118	121188237	BC048403	3UTR	11126
chr10	121218233	121218832	Srgap1	3UTR	265539
chr10	121219625	121219864	Srgap1	3UTR	264507
chr10	121567375	121567734	Gm4489	3UTR	10623
chr10	126608776	126609015	B4galnt1	3UTR	6565
chr10	126664890	126665129	Kif5a	3UTR	35290
chr10	126786693	126787052	Inhbe	3UTR	1776
chr10	126962353	126962712	Nxph4	3UTR	8903
chr10	127229494	127229973	Rdh9	3UTR	16034
chr10	128156918	128157277	Pmel	3UTR	13605
chr17	5343581	5343700	Arid1b	3UTR	348508
chr17	5930563	5930802	Snx9	3UTR	89184
chr17	6306713	6306832	Tmem181a	3UTR	36244
chr17	6309712	6309951	Dynlt1a	3UTR	7523
chr17	6942544	6942663	Ezr	3UTR	44466
chr17	6942781	6942900	Ezr	3UTR	44229
chr17	10402291	10402530	Qk	3UTR	109696
chr17	12412053	12412172	Agpat4	3UTR	99904
chr17	12420684	12420803	Map3k4	3UTR	90723
chr17	13289517	13289876	Gm11166	3UTR	1462
chr17	13679931	13680170	2700054A10Rik	3UTR	66790
chr17	15680102	15680221	Prdm9	3UTR	20066
chr17	23812262	23812381	Hcfc1r1	3UTR	1688
chr17	25799453	25799572	Lmf1	3UTR	83335
chr17	26350301	26350420	Itfg3	3UTR	30767
chr17	27699820	27700179	Hmga1-rs1	3UTR	6223
chr17	27717292	27717531	Nudt3	3UTR	42866
chr17	28033111	28033350	Uhrf1bp1	3UTR	39660
chr17	29388168	29388407	Ppil1	3UTR	12509
chr17	30345385	30345624	Zfand3	3UTR	203354
chr17	30356454	30356813	Btbd9	3UTR	356419
chr17	31254462	31254581	Abcg1	3UTR	59824
chr17	31741765	31742124	Pknox1	3UTR	40048
chr17	31981755	31981874	Sik1	3UTR	10863
chr17	31981991	31982110	Sik1	3UTR	10627
chr17	31982719	31983287	Sik1	3UTR	9450
chr17	32198421	32198900	Rrp1b	3UTR	25315
chr17	32334260	32334499	Brd4	3UTR	86569
chr17	34065437	34065676	Tapbp	3UTR	9015
chr17	35115808	35115927	Hspa1l	3UTR	6161
chr17	35390200	35390679	Ddx39b	3UTR	11510
chr17	44176153	44176392	Rcan2	3UTR	237354
chr17	44222604	44222843	Enpp5	3UTR	6810
chr17	44414107	44414346	Clic5	3UTR	88587
chr17	46155445	46155564	Vegfa	3UTR	13762
chr17	47550023	47550262	1700001C19Rik	3UTR	24062
chr17	47625459	47625698	Taf8	3UTR	13538
chr17	56552020	56552139	Ptprs	3UTR	63764
chr17	56552230	56552349	Ptprs	3UTR	63554
chr17	62952646	62953005	Efna5	3UTR	277661
chr17	62956539	62956658	Efna5	3UTR	274008
chr17	64631666	64631905	Pja2	3UTR	49318
chr17	66272876	66273235	Twsg1	3UTR	27292
chr17	66686613	66686852	Soga2	3UTR	112238
chr17	66844257	66844496	Rab12	3UTR	24514
chr17	68193801	68194280	Arhgap28	3UTR	159168
chr17	69189630	69189869	Tmem200c	3UTR	3155
chr17	69836636	69836755	A330050F15Rik	3UTR	47971
chr17	69836770	69837009	A330050F15Rik	3UTR	48105
chr17	72213079	72213318	Clip4	3UTR	94049
chr17	73591932	73592171	Lclat1	3UTR	134608
chr17	78773416	78773775	Crim1	3UTR	173829
chr17	79054709	79054948	Strn	3UTR	80952
chr17	80980218	80980457	Map4k3	3UTR	146976
chr16	4545186	4545545	Tfap4	3UTR	14175
chr16	13415451	13415690	Mkl2	3UTR	158878
chr16	15555035	15555274	Ube2v2	3UTR	39337
chr16	17046977	17047216	Mapk1	3UTR	63503
chr16	17260071	17260190	Hic2	3UTR	26392
chr16	17650626	17650865	Ccdc74a	3UTR	4064
chr16	19654535	19654654	Lamp3	3UTR	51804
chr16	20332058	20332177	Abcc5	3UTR	94290
chr16	22381297	22381776	Etv5	3UTR	57867
chr16	22382832	22383071	Etv5	3UTR	56572
chr16	23926196	23926435	Rtp2	3UTR	4445
chr16	29652345	29652584	Opa1	3UTR	72926
chr16	30020342	30020581	4632428C04Rik	3UTR	11590
chr16	30308095	30308214	Gp5	3UTR	2653
chr16	31095719	31096078	Acap2	3UTR	105246
chr16	32473855	32473974	Pcyt1a	3UTR	42849
chr16	33242953	33243312	Osbpl11	3UTR	57797
chr16	52204751	52204870	Cblb	3UTR	173090
chr16	59493079	59493438	Crybg3	3UTR	62140
chr16	62734560	62735251	Nsun3	3UTR	51291
chr16	78251480	78251719	E330011O21Rik	3UTR	3980
chr16	87595383	87595622	Map3k7cl	3UTR	41809
chr16	89570581	89570820	Krtap11-1	3UTR	608
chr16	89788812	89789171	Tiam1	3UTR	185773
chr15	7786222	7786341	Gdnf	3UTR	25212
chr15	20596405	20596524	Acot10	3UTR	100
chr15	31388757	31389116	2015-03-06	3UTR	71676
chr15	36926905	36927024	Zfp706	3UTR	10133
chr15	41697297	41697536	Abra	3UTR	3730
chr15	57671061	57671300	Zhx2	3UTR	144840
chr15	57701840	57701959	Derl1	3UTR	22014
chr15	57702232	57702351	Derl1	3UTR	21622
chr15	57702538	57702657	Derl1	3UTR	21316
chr15	58774799	58775038	Mtss1	3UTR	138543
chr15	59486415	59486654	Trib1	3UTR	6207
chr15	59486967	59487326	Trib1	3UTR	6759
chr15	63919223	63919342	Asap1	3UTR	295139
chr15	63920580	63920819	Asap1	3UTR	293662
chr15	75811236	75811475	Ccdc166	3UTR	1240
chr15	76126960	76127079	Smpd5	3UTR	2097
chr15	76184317	76184436	Maf1	3UTR	2594
chr15	76452461	76452700	Vps28	3UTR	3757
chr15	76534333	76534452	Mfsd3	3UTR	2362
chr15	78355478	78355597	C1qtnf6	3UTR	4484
chr15	79746311	79746670	Cbx7	3UTR	16406
chr15	79827471	79827590	Pdgfb	3UTR	17648
chr15	80761484	80761843	Tnrc6b	3UTR	219742
chr15	83687078	83687317	Mpped1	3UTR	76626
chr15	84383857	84384096	Ldoc1l	3UTR	4157
chr15	84386551	84386910	Ldoc1l	3UTR	1343
chr15	84771013	84771132	Nup50	3UTR	17156
chr15	84778854	84779093	5031439G07Rik	3UTR	39308
chr15	85971712	85972146	Cerk	3UTR	44425
chr15	90060076	90060315	Alg10b	3UTR	5335
chr15	90060370	90060489	Alg10b	3UTR	5629
chr15	93071933	93072052	Gxylt1	3UTR	33463
chr15	93072557	93072676	Gxylt1	3UTR	32839
chr15	93073968	93074327	Gxylt1	3UTR	31188
chr15	94409487	94409726	Twf1	3UTR	10529
chr15	95803900	95804139	Ano6	3UTR	182627
chr15	95905019	95905378	D030018L15Rik	3UTR	4605
chr15	95906440	95906799	D030018L15Rik	3UTR	3184
chr15	95908549	95908668	D030018L15Rik	3UTR	1315
chr15	95908680	95908919	D030018L15Rik	3UTR	1064
chr15	96101385	96101504	E330033B04Rik	3UTR	4202
chr15	96102938	96103057	E330033B04Rik	3UTR	2649
chr15	96403186	96403305	Slc38a1	3UTR	70039
chr15	96403386	96403505	Slc38a1	3UTR	69839
chr15	96406698	96407177	Slc38a1	3UTR	66167
chr15	96520374	96520613	Slc38a2	3UTR	9516
chr15	98422426	98422785	Adcy6	3UTR	15279
chr15	99239729	99239968	Tmbim6	3UTR	16352
chr15	99530433	99530552	Asic1	3UTR	29285
chr15	100218570	100218689	Slc11a2	3UTR	34797
chr15	100218804	100218923	Slc11a2	3UTR	34563
chr15	100311052	100311171	Csrnp2	3UTR	14499
chr15	100311225	100311344	Csrnp2	3UTR	14326
chr15	100406130	100406249	Pou6f1	3UTR	10547
chr15	100471791	100471910	Bin2	3UTR	28021
chr15	100882466	100882705	Fignl2	3UTR	2125
chr15	101946853	101947092	Spryd3	3UTR	19554
chr14	21555788	21556147	Camk2g	3UTR	57163
chr14	22612891	22613130	Samd8	3UTR	43139
chr14	22613848	22613967	Samd8	3UTR	44096
chr14	26705340	26705819	Anxa11	3UTR	43700
chr14	29336115	29336234	Wnt5a	3UTR	17457
chr14	30851496	30851975	Chdh	3UTR	29311
chr14	31984252	31984611	Nisch	3UTR	35401
chr14	32515097	32515216	Ankrd28	3UTR	128385
chr14	33390156	33390515	Ercc6	3UTR	63450
chr14	33392522	33392641	Ercc6	3UTR	65816
chr14	33477124	33477363	3425401B19Rik	3UTR	21095
chr14	37692602	37692721	Ccser2	3UTR	89229
chr14	46078511	46078750	Fermt2	3UTR	70990
chr14	46215037	46215276	Ddhd1	3UTR	62542
chr14	47775269	47775388	Gch1	3UTR	33689
chr14	52883150	52883389	Rab2b	3UTR	15681
chr14	55126549	55126668	Prmt5	3UTR	9639
chr14	55716366	55716605	Thtpa	3UTR	2746
chr14	58730471	58730590	Fgf9	3UTR	38949
chr14	58730682	58730801	Fgf9	3UTR	39160
chr14	60248997	60249236	Shisa2	3UTR	4880
chr14	61382232	61382591	Spata13	3UTR	128667
chr14	63765026	63765265	Fdft1	3UTR	31365
chr14	65441426	65441785	Hmbox1	3UTR	126899
chr14	69862768	69863007	Slc25a37	3UTR	40153
chr14	71065537	71065656	Xpo7	3UTR	100779
chr14	76535785	76536024	Nufip1	3UTR	25088
chr14	78893392	78893631	Akap11	3UTR	43036
chr14	79601172	79601291	Vwa8	3UTR	352188
chr14	80262283	80262762	Gm10845	3UTR	6221
chr14	88866573	88866692	Pcdh20	3UTR	4511
chr14	104214770	104215129	Ednrb	3UTR	28564
chr19	4984277	4984756	Npas4	3UTR	5215
chr19	5031758	5031997	Slc29a2	3UTR	7753
chr19	5379892	5380011	Sart1	3UTR	8692
chr19	5426381	5426740	AI837181	3UTR	1238
chr19	5647442	5647681	Rela	3UTR	9953
chr19	5800833	5801072	Malat1	3UTR	1599
chr19	6227566	6227805	Gpha2	3UTR	1166
chr19	7273407	7273526	Otub1	3UTR	7248
chr19	7660913	7661032	Pla2g16	3UTR	28965
chr19	10788182	10788421	Vps37c	3UTR	24878
chr19	12066512	12066751	Osbp	3UTR	26179
chr19	12067687	12067926	Osbp	3UTR	27354
chr19	29386299	29386538	Jak2	3UTR	59982
chr19	29685571	29685810	Ermp1	3UTR	37100
chr19	30641134	30641253	Prkg1	3UTR	1198270
chr19	30641464	30641583	Prkg1	3UTR	1197940
chr19	34886707	34886826	Pank1	3UTR	67119
chr19	36530229	36530468	Pcgf5	3UTR	76673
chr19	37098837	37099556	Cpeb3	3UTR	182227
chr19	38477960	38478079	Slc35g1	3UTR	7491
chr19	41158606	41158725	Tll2	3UTR	122539
chr19	41285740	41285979	Tm9sf3	3UTR	52515
chr19	42225615	42225974	Marveld1	3UTR	3737
chr19	42666241	42666480	R3hcc1l	3UTR	72947
chr19	42669272	42669511	Loxl4	3UTR	17785
chr19	43806233	43806352	Entpd7	3UTR	42055
chr19	43808780	43809019	Cox15	3UTR	18471
chr19	43809025	43809144	Cox15	3UTR	18346
chr19	44647177	44647296	Hif1an	3UTR	9834
chr19	45603481	45603600	Btrc	3UTR	165258
chr19	45605219	45605458	Btrc	3UTR	166996
chr19	47575539	47575892	Obfc1	3UTR	35618
chr19	47970845	47970964	Itprip	3UTR	22825
chr19	53320970	53321329	Add3	3UTR	106038
chr19	55699155	55699394	Vti1a	3UTR	308315
chr19	57398328	57398447	B230217O12Rik	3UTR	36942
chr19	57460921	57461280	Fam160b1	3UTR	25423
chr19	57461910	57462029	Fam160b1	3UTR	26412
chr19	57462813	57463052	Fam160b1	3UTR	27315
chr19	59045191	59045550	Eno4	3UTR	27277
chr18	5773546	5773665	Zeb1	3UTR	181689
chr18	9619225	9619704	Cetn1	3UTR	242
chr18	11084836	11085075	Gata6	3UTR	32329
chr18	24264429	24264788	Ino80c	3UTR	15532
chr18	24443432	24443791	Galnt1	3UTR	79588
chr18	31740125	31740591	Slc25a46	3UTR	28965
chr18	32387836	32388195	Map3k2	3UTR	65094
chr18	32594751	32595230	Bin1	3UTR	57881
chr18	34930760	34931239	Fam53c	3UTR	12201
chr18	35063465	35063704	Etf1	3UTR	27953
chr18	36177398	36177517	Nrg2	3UTR	179297
chr18	38748938	38749057	Spry4	3UTR	11865
chr18	43476290	43476529	Stk32a	3UTR	108940
chr18	44582307	44582426	Dcp2	3UTR	42154
chr18	44585068	44585427	Mcc	3UTR	386409
chr18	44585511	44585750	Mcc	3UTR	386086
chr18	47407523	47407882	Sema6a	3UTR	120640
chr18	49855885	49856124	Dtwd2	3UTR	59131
chr18	53863959	53864318	Gm19466	3UTR	56155
chr18	54114092	54114331	Csnk1g3	3UTR	92326
chr18	57551291	57551410	Prrc1	3UTR	36905
chr18	58168772	58168891	Fbn2	3UTR	200689
chr18	61145693	61145932	Camk2a	3UTR	60408
chr18	61457777	61458016	Ppargc1b	3UTR	102069
chr18	61959247	61959366	Ablim3	3UTR	112140
chr18	61960384	61960623	Ablim3	3UTR	110883
chr18	62911857	62911976	2700046A07Rik	3UTR	4025
chr18	62912071	62912190	2700046A07Rik	3UTR	3811
chr18	63156691	63156810	Napg	3UTR	19122
chr18	63158634	63158873	Napg	3UTR	21065
chr18	64690818	64690937	Atp8b1	3UTR	129717
chr18	65372610	65372729	Nedd4l	3UTR	325201
chr18	65848267	65848386	Zfp532	3UTR	108384
chr18	65848629	65849108	Zfp532	3UTR	108746
chr18	66140663	66140902	Lman1	3UTR	21387
chr18	66670709	66670948	Gm9926	3UTR	6878
chr18	68424270	68424629	Fam210a	3UTR	35358
chr18	70400538	70400657	Dynap	3UTR	3581
chr18	74178834	74179193	D730045A05Rik	3UTR	1274
chr18	74356198	74356317	Ska1	3UTR	11155
chr18	74380963	74381082	Cxxc1	3UTR	5098
chr18	75169363	75169722	BC031181	3UTR	3810
chr18	75448559	75448918	2010010A06Rik	3UTR	8053
chr18	75553995	75554234	Smad7	3UTR	26977
chr18	77696161	77696400	Rnf165	3UTR	107475
chr18	77697674	77697913	Rnf165	3UTR	105962
chr7	3625516	3625755	Tmc4	Intron	3400
chr7	3656627	3656746	Rps9	Intron	985
chr7	3839352	3839591	Pira1	Intron	27495
chr7	3969314	3969433	Lair1	Intron	45373
chr7	3969622	3969741	Lair1	Intron	45065
chr7	4009180	4009779	Lair1	Intron	5027
chr7	4013895	4014134	Lair1	Intron	672
chr7	4038301	4038540	9430041J12Rik	Intron	33790
chr7	4056073	4056672	9430041J12Rik	Intron	15658
chr7	4228437	4228676	Pira6	Intron	2647
chr7	4230530	4230649	Pira6	Intron	4740
chr7	4230742	4230861	Pira6	Intron	4952
chr7	4231421	4231780	Pira6	Intron	5631
chr7	4340163	4340282	Gp6	Intron	9064
chr7	4380244	4380363	Rdh13	Intron	16896
chr7	4472644	4472763	Tnni3	Intron	1282
chr7	4476259	4476498	Dnaaf3	Intron	7546
chr7	4555246	4555365	Ptprh	Intron	278
chr7	4590663	4590782	Ppp6r1	Intron	19770
chr7	4707741	4707980	Fam71e2	Intron	14892
chr7	4808381	4808740	Isoc2b	Intron	9041
chr7	4946680	4946799	Zfp579	Intron	904
chr7	5020018	5020257	U2af2	Intron	6274
chr7	5021365	5021604	U2af2	Intron	7621
chr7	5256830	5256949	Nlrp2	Intron	45688
chr7	5288109	5288348	Nlrp2	Intron	14289
chr7	5305213	5305332	Gm5065	Intron	3070
chr7	5305871	5306470	Gm5065	Intron	3728
chr7	5308878	5308997	Gm5065	Intron	6735
chr7	6007617	6007736	Nlrp4c	Intron	10855
chr7	6020756	6020875	Nlrp4c	Intron	23994
chr7	6037605	6037724	Nlrp4c	Intron	40843
chr7	6180716	6180835	Zscan5b	Intron	6837
chr7	6205761	6206120	Gm6792	Intron	1450
chr7	6344991	6345230	Zfp28	Intron	8964
chr7	6645612	6645731	Zim1	Intron	3412
chr7	7175159	7175278	Vmn2r29	Intron	55722
chr7	7224653	7225012	Vmn2r29	Intron	5988
chr7	7249262	7249381	Clcn4-2	Intron	2841
chr7	7249768	7250007	Clcn4-2	Intron	2215
chr7	8647830	8647949	Vmn2r35	Intron	7963
chr7	8648113	8648232	Vmn2r35	Intron	8246
chr7	8648721	8649440	Vmn2r35	Intron	8854
chr7	8651648	8651767	Vmn2r35	Intron	11781
chr7	8651900	8652019	Vmn2r35	Intron	12033
chr7	8653194	8653313	Vmn2r35	Intron	13327
chr7	8653415	8653654	Vmn2r35	Intron	13548
chr7	8657827	8658546	Vmn2r35	Intron	17960
chr7	8661006	8661125	Vmn2r35	Intron	21139
chr7	8662381	8662980	Vmn2r35	Intron	22514
chr7	8664289	8664408	Vmn2r35	Intron	24422
chr7	8664942	8665661	Vmn2r35	Intron	25075
chr7	8723955	8724314	Vmn2r35	Intron	84088
chr7	8726299	8726538	Vmn2r35	Intron	86432
chr7	8807286	8807525	Vmn2r35	Intron	167419
chr7	8835276	8835515	Vmn2r35	Intron	195409
chr7	8835635	8835754	Vmn2r35	Intron	195768
chr7	8836229	8836468	Vmn2r35	Intron	196362
chr7	8836570	8836689	Vmn2r35	Intron	196703
chr7	9101678	9101797	Vmn2r38	Intron	21647
chr7	9267950	9268069	Vmn2r40	Intron	21512
chr7	13121988	13122343	2900092C05Rik	Intron	24089
chr7	13131574	13131813	2900092C05Rik	Intron	33675
chr7	13132622	13132741	2900092C05Rik	Intron	34723
chr7	13132867	13133226	2900092C05Rik	Intron	34968
chr7	13133358	13133477	2900092C05Rik	Intron	35459
chr7	13140670	13140909	2900092C05Rik	Intron	42771
chr7	13188085	13188204	Vmn2r53	Intron	3689
chr7	13258273	13258392	Vmn2r55	Intron	11948
chr7	13258652	13258771	Vmn2r55	Intron	11569
chr7	14342805	14343044	Sult2a2	Intron	23951
chr7	14347572	14347691	Sult2a2	Intron	28718
chr7	14347919	14348278	Sult2a2	Intron	29065
chr7	14505583	14505822	Sult2a4	Intron	69115
chr7	14511686	14511805	Sult2a4	Intron	63132
chr7	14518472	14518711	Sult2a4	Intron	56226
chr7	14518872	14519111	Sult2a4	Intron	55826
chr7	14554232	14554351	Sult2a4	Intron	20586
chr7	14554710	14554949	Sult2a4	Intron	19988
chr7	14560447	14560566	Sult2a4	Intron	14371
chr7	14669369	14669488	Sult2a3	Intron	38854
chr7	14671705	14671824	Sult2a3	Intron	36518
chr7	14672409	14672768	Sult2a3	Intron	35574
chr7	14672813	14673412	Sult2a3	Intron	34930
chr7	15000507	15000626	2810007J24Rik	Intron	31310
chr7	15000814	15001053	2810007J24Rik	Intron	30883
chr7	15129961	15130320	Nlrp5-ps	Intron	77507
chr7	16503004	16503243	Sepw1	Intron	4477
chr7	16561904	16562143	Gltscr1	Intron	22701
chr7	16572108	16572347	Gltscr1	Intron	12497
chr7	16572742	16572861	Gltscr1	Intron	11983
chr7	16707836	16708075	Kptn	Intron	2612
chr7	16951675	16951794	Sae1	Intron	21340
chr7	16995441	16995680	Zc3h4	Intron	8897
chr7	17007530	17007889	Zc3h4	Intron	20986
chr7	17327037	17327156	Ap2s1	Intron	3245
chr7	17327218	17327337	Ap2s1	Intron	3426
chr7	17435368	17435607	Prkd2	Intron	7118
chr7	17438321	17438560	Prkd2	Intron	10071
chr7	17502299	17502418	Calm3	Intron	6963
chr7	17594712	17594951	Ppp5c	Intron	18312
chr7	17624288	17624647	Hif3a	Intron	23129
chr7	17634880	17635239	Hif3a	Intron	12537
chr7	18344196	18344435	Ceacam5	Intron	45596
chr7	19200813	19201052	Psg23	Intron	798
chr7	19261830	19261949	Psg20	Intron	9392
chr7	19439089	19439208	Mill2	Intron	13775
chr7	19517995	19518234	Nova2	Intron	6759
chr7	19529437	19529556	Nova2	Intron	18201
chr7	19609953	19610228	Sympk	Intron	228
chr7	19612125	19612364	Sympk	Intron	2400
chr7	19798273	19798512	Gpr4	Intron	387
chr7	19862785	19862904	Ppm1n	Intron	2494
chr7	19863755	19863994	Ppm1n	Intron	1404
chr7	19938853	19939092	Ercc1	Intron	8434
chr7	19967817	19968056	Ercc2	Intron	430
chr7	20146474	20146713	Ppp1r37	Intron	1034
chr7	20151974	20152213	Gemin7	Intron	6479
chr7	20173950	20174189	Clasrp	Intron	15628
chr7	20201165	20201404	Relb	Intron	13383
chr7	20213456	20213575	Relb	Intron	1212
chr7	20219191	20219550	Clptm1	Intron	30829
chr7	20259076	20259435	Apoc2	Intron	3855
chr7	20329699	20330057	Pvrl2	Intron	4865
chr7	20343846	20344085	Bcam	Intron	11796
chr7	20350818	20351057	Bcam	Intron	4824
chr7	20351801	20352040	Bcam	Intron	3841
chr7	20369725	20369964	Cblc	Intron	12194
chr7	20380329	20380568	Cblc	Intron	1590
chr7	20396389	20396868	Bcl3	Intron	11236
chr7	20397868	20397987	Bcl3	Intron	10117
chr7	20438910	20439269	Gm19345	Intron	1559
chr7	20500426	20500545	Pvr	Intron	5947
chr7	20500622	20500981	Pvr	Intron	5511
chr7	20502116	20502235	Pvr	Intron	4257
chr7	20534507	20534626	Igsf23	Intron	1466
chr7	20560617	20560736	Ceacam20	Intron	9857
chr7	23508232	23508591	Gm6902	Intron	177183
chr7	23517748	23517987	Gm6902	Intron	167787
chr7	23527716	23527835	Gm6902	Intron	157939
chr7	23947826	23947945	Gm4541	Intron	11047
chr7	24092395	24092874	Nlrp4e	Intron	6185
chr7	24095496	24095615	Nlrp4e	Intron	9286
chr7	24097291	24097410	Nlrp4e	Intron	11081
chr7	24098549	24098788	Nlrp4e	Intron	12339
chr7	24142653	24143012	Nlrp4e	Intron	56443
chr7	24212143	24212742	Nlrp5	Intron	41228
chr7	24897970	24898209	Zfp112	Intron	632
chr7	24905876	24905995	Zfp112	Intron	8538
chr7	25020010	25020249	Zfp109	Intron	2368
chr7	25081279	25081398	Zfp61	Intron	3170
chr7	25095258	25095497	Zfp94	Intron	6188
chr7	25162909	25163148	Kcnn4	Intron	7628
chr7	25190048	25190167	Smg9	Intron	5402
chr7	25198015	25198254	Smg9	Intron	13369
chr7	25201356	25201595	Smg9	Intron	16710
chr7	25256740	25256979	Plaur	Intron	9222
chr7	25278170	25278529	Cadm4	Intron	11129
chr7	25292477	25292596	Zfp428	Intron	372
chr7	25328145	25328384	Pinlyp	Intron	2640
chr7	25342398	25342517	Xrcc1	Intron	10230
chr7	25345310	25345789	Xrcc1	Intron	13142
chr7	25354684	25354923	Xrcc1	Intron	22516
chr7	25371103	25371222	Zfp575	Intron	1438
chr7	25371327	25371446	Zfp575	Intron	1214
chr7	25373522	25373761	Ethe1	Intron	961
chr7	25377942	25378061	Ethe1	Intron	5381
chr7	25378263	25378382	Ethe1	Intron	5702
chr7	25392073	25392192	Ethe1	Intron	19512
chr7	25392727	25392846	Ethe1	Intron	20166
chr7	25403353	25403592	Phldb3	Intron	7007
chr7	25408576	25408815	Phldb3	Intron	12230
chr7	25410404	25410643	Phldb3	Intron	14058
chr7	25411803	25411922	Phldb3	Intron	15457
chr7	25455086	25455325	Tex101	Intron	1744
chr7	25800645	25800764	Grik5	Intron	56624
chr7	25831002	25831121	Grik5	Intron	26267
chr7	25882862	25883101	Pou2f2	Intron	34378
chr7	25887979	25888218	Pou2f2	Intron	29261
chr7	25892088	25892207	Pou2f2	Intron	25272
chr7	25892210	25892329	Pou2f2	Intron	25150
chr7	25892592	25893071	Pou2f2	Intron	24408
chr7	25895563	25895922	Pou2f2	Intron	21557
chr7	25900534	25900893	Pou2f2	Intron	16586
chr7	25912333	25912452	Pou2f2	Intron	5027
chr7	25939393	25939752	D930028M14Rik	Intron	1918
chr7	26086471	26086590	Prr19	Intron	94
chr7	26121650	26121889	Megf8	Intron	19468
chr7	26123245	26123364	Megf8	Intron	21063
chr7	26137290	26137649	Megf8	Intron	35108
chr7	26140431	26140670	Megf8	Intron	38249
chr7	26194143	26194262	4732471J01Rik	Intron	14412
chr7	26435935	26436054	Bckdha	Intron	7726
chr7	26459467	26460301	Tmem91	Intron	718
chr7	26480634	26480873	Tgfb1	Intron	8614
chr7	26547956	26548195	Axl	Intron	25557
chr7	26559641	26559880	Axl	Intron	13872
chr7	26559892	26560011	Axl	Intron	13741
chr7	26689628	26689867	Cyp2b10	Intron	6946
chr7	26703421	26703660	Cyp2b10	Intron	20739
chr7	27255506	27255745	Nlrp4a	Intron	35375
chr7	27255936	27256295	Nlrp4a	Intron	35805
chr7	27259206	27259445	Nlrp4a	Intron	39075
chr7	27554273	27554632	Cyp2b19	Intron	12068
chr7	27599265	27599384	Cyp2g1	Intron	5320
chr7	27621559	27621798	Cyp2a5	Intron	1202
chr7	27905767	27906006	Cyp2f2	Intron	794
chr7	27938966	27939085	Cyp2t4	Intron	234
chr7	27940988	27941347	Cyp2t4	Intron	2256
chr7	27975441	27975560	Snrpa	Intron	5730
chr7	27975601	27975840	Snrpa	Intron	5450
chr7	27984287	27984526	BC024978	Intron	3488
chr7	28020014	28020253	Adck4	Intron	1983
chr7	28113659	28114115	Ltbp4	Intron	8516
chr7	28118768	28118887	Ltbp4	Intron	3744
chr7	28118895	28119014	Ltbp4	Intron	3617
chr7	28128667	28128786	Shkbp1	Intron	12241
chr7	28133173	28133412	Shkbp1	Intron	7615
chr7	28154612	28154731	Sptbn4	Intron	76877
chr7	28163157	28163396	Sptbn4	Intron	68212
chr7	28165240	28165479	Sptbn4	Intron	66129
chr7	28181424	28181543	Sptbn4	Intron	50065
chr7	28184886	28185125	Sptbn4	Intron	46483
chr7	28193085	28193204	Sptbn4	Intron	38404
chr7	28203462	28203581	Sptbn4	Intron	28027
chr7	28224900	28225019	Sptbn4	Intron	6589
chr7	28226636	28226875	Sptbn4	Intron	4733
chr7	28228642	28228881	Sptbn4	Intron	2727
chr7	28396425	28396664	Akt2	Intron	19847
chr7	28396982	28397221	Akt2	Intron	20404
chr7	28419718	28419837	Akt2	Intron	43140
chr7	28445709	28445828	Map3k10	Intron	13789
chr7	28445958	28446077	Map3k10	Intron	13540
chr7	28461145	28461384	C030039L03Rik	Intron	1466
chr7	28465284	28465523	C030039L03Rik	Intron	5605
chr7	28466653	28466892	C030039L03Rik	Intron	6974
chr7	28479823	28480062	C030039L03Rik	Intron	20144
chr7	28554586	28554705	Gm10046	Intron	3895
chr7	28649171	28649410	Zfp607	Intron	3568
chr7	28789031	28789270	Gm4636	Intron	9864
chr7	28829813	28830052	Psmc4	Intron	5059
chr7	28883919	28884398	Fcgbp	Intron	27665
chr7	28894602	28894721	Fcgbp	Intron	38348
chr7	28895034	28895153	Fcgbp	Intron	38780
chr7	28897282	28897521	Fcgbp	Intron	41028
chr7	28903740	28903979	Fcgbp	Intron	47486
chr7	28958958	28959197	Fbl	Intron	4192
chr7	28967501	28967620	Dyrk1b	Intron	3000
chr7	29086059	29086178	Dll3	Intron	626
chr7	29109065	29109184	Supt5	Intron	14554
chr7	29237338	29237457	Lrfn1	Intron	82
chr7	29331526	29331765	Nccrp1	Intron	508
chr7	29349664	29349783	Pak4	Intron	33420
chr7	29368208	29368447	Pak4	Intron	14756
chr7	29378090	29378209	Pak4	Intron	4994
chr7	29410986	29411225	C330005M16Rik	Intron	4809
chr7	29481841	29481960	Fbxo27	Intron	3974
chr7	29502644	29502763	Fbxo17	Intron	836
chr7	29514193	29514432	Fbxo17	Intron	12385
chr7	29528214	29528333	Sars2	Intron	1228
chr7	29528487	29528606	Sars2	Intron	1501
chr7	29536874	29537113	Sars2	Intron	9888
chr7	29542976	29543095	Gm6537	Intron	1784
chr7	29544657	29544896	Nfkbib	Intron	6647
chr7	29548285	29548524	Nfkbib	Intron	3019
chr7	29558009	29558128	Sirt2	Intron	6239
chr7	29600179	29600298	Hnrnpl	Intron	4271
chr7	29668041	29668160	Capn12	Intron	1367
chr7	29696352	29696471	Actn4	Intron	50828
chr7	29759144	29759383	Eif3k	Intron	7450
chr7	29781494	29781613	Map4k1	Intron	13622
chr7	29790656	29790775	Ryr1	Intron	119395
chr7	29817271	29817510	Ryr1	Intron	92660
chr7	29866674	29866913	Ryr1	Intron	43257
chr7	29867699	29868058	Ryr1	Intron	42112
chr7	29872178	29872297	Ryr1	Intron	37873
chr7	29876988	29877347	Ryr1	Intron	32823
chr7	29909784	29909903	Ryr1	Intron	267
chr7	29928325	29928564	Rasgrp4	Intron	8374
chr7	29994639	29994878	Catsperg1	Intron	4174
chr7	30028656	30029015	Yif1b	Intron	5315
chr7	30171459	30171698	Sipa1l3	Intron	118781
chr7	30175211	30175570	Sipa1l3	Intron	114909
chr7	30182004	30182123	Sipa1l3	Intron	108356
chr7	30223174	30223533	Sipa1l3	Intron	66946
chr7	30224144	30224263	Sipa1l3	Intron	66216
chr7	30247102	30247221	Sipa1l3	Intron	43258
chr7	30260940	30261059	Sipa1l3	Intron	29420
chr7	30265831	30266070	Sipa1l3	Intron	24409
chr7	30274095	30274214	Sipa1l3	Intron	16265
chr7	30648468	30648587	Zfp420	Intron	3471
chr7	30781785	30781904	Zfp568	Intron	12812
chr7	30794913	30795032	Zfp568	Intron	25940
chr7	30800593	30800832	Zfp568	Intron	31620
chr7	30804366	30804485	Zfp568	Intron	35393
chr7	30845743	30845862	Zfp82	Intron	11980
chr7	30884338	30884457	Zfp260	Intron	4244
chr7	30907765	30907884	Zfp382	Intron	799
chr7	30910562	30910801	Zfp382	Intron	3596
chr7	30915131	30915370	Zfp382	Intron	8165
chr7	30951545	30951904	Zfp146	Intron	2842
chr7	30961557	30961916	Gm5113	Intron	6617
chr7	30962157	30962516	Gm5113	Intron	7217
chr7	30977596	30977715	Capns1	Intron	2352
chr7	31041562	31041801	Wdr62	Intron	23639
chr7	31081883	31082242	Clip3	Intron	5112
chr7	31091462	31091821	Clip3	Intron	14691
chr7	31102833	31103072	Syne4	Intron	2999
chr7	31283083	31283202	Prodh2	Intron	4407
chr7	31334748	31334987	BC053749	Intron	2304
chr7	31393984	31394103	Upk1a	Intron	3390
chr7	31500199	31501025	Atp4a	Intron	2949
chr7	31696763	31696882	Mag	Intron	2969
chr7	31848432	31848671	Lgi4	Intron	3479
chr7	31885733	31885852	Hpn	Intron	14493
chr7	31892836	31893075	Hpn	Intron	7270
chr7	31924171	31924410	Gramd1a	Intron	11659
chr7	31929816	31929935	Gramd1a	Intron	6134
chr7	31954302	31954541	Gm10640	Intron	6926
chr7	34414327	34414806	Scgb2b23-ps	Intron	23494
chr7	34905278	34905517	Wtip	Intron	12770
chr7	34907461	34907820	Wtip	Intron	10467
chr7	34951838	34951957	Uba2	Intron	1591
chr7	35138918	35139157	Lsm14a	Intron	35402
chr7	35434397	35434636	Kctd15	Intron	3224
chr7	35462489	35462848	Chst8	Intron	134882
chr7	35465721	35466080	Chst8	Intron	131650
chr7	35475306	35475545	Chst8	Intron	122185
chr7	35483497	35483616	Chst8	Intron	114114
chr7	35483839	35484078	Chst8	Intron	113652
chr7	35524743	35524862	Chst8	Intron	72868
chr7	35538039	35538278	Chst8	Intron	59452
chr7	35544218	35544457	Chst8	Intron	53273
chr7	35549783	35549902	Chst8	Intron	47828
chr7	35559095	35559214	Chst8	Intron	38516
chr7	35562060	35562299	Chst8	Intron	35431
chr7	35589662	35590141	Chst8	Intron	7589
chr7	35716431	35716670	Pepd	Intron	19006
chr7	35748502	35748741	Pepd	Intron	51077
chr7	35750193	35750432	Pepd	Intron	52768
chr7	35756991	35757230	Pepd	Intron	59566
chr7	35763927	35764046	Pepd	Intron	66502
chr7	35797204	35797443	Pepd	Intron	99779
chr7	36085330	36085449	Gpatch1	Intron	18010
chr7	36155987	36156106	Rhpn2	Intron	36732
chr7	36173398	36173517	Rhpn2	Intron	54143
chr7	36208363	36208482	Cep89	Intron	26252
chr7	36220884	36221363	Cep89	Intron	38773
chr7	36313510	36313869	Tdrd12	Intron	8894
chr7	36389143	36389502	Ankrd27	Intron	17878
chr7	36389523	36389762	Ankrd27	Intron	18258
chr7	36410490	36410609	Ankrd27	Intron	39225
chr7	36421999	36422118	Ankrd27	Intron	50734
chr7	36430685	36430924	Pdcd5	Intron	1577
[truncated: 77,772 more rows]
